# Supplementary material for: Genomic analyses reveal two distinct lineages of Corynebacterium ulcerans strains
Source: PubMed Central journal article supplement (PMC6038270; doi:10.1016/j.nmni.2018.05.005), 2018-05-25
Supplement: mmc1.pdf [file mmc1.pdf]

Supplementary Table 1. Details of strains and genomes analysed in this study

| Cluster | Strain ID      | Genome size (Mb) | GC (Mol%) | Host   | Year | Country      | Clinical information      | Accession Numbers | Reference or genome release date |
|---------|----------------|------------------|-----------|--------|------|--------------|---------------------------|-------------------|----------------------------------|
| 1       | BR-AD 2649     | 2.54             | 53.3      | Canine | 2015 | Brazil       | asymptomatic              | MPST00000000      | This study                       |
| 1       | BR-AD 22       | 2.61             | 53.4      | Canine | 2010 | Brazil       | asymptomatic              | NC_015683.1       | (Trost et al., 2011)             |
| 1       | 0102           | 2.58             | 53.4      | Human  | 2001 | Japan        | diphtheria-like illness   | NC_018101.1       | (Sekizuka et al., 2012)          |
| 1       | 04-3911        | 2.49             | 53.3      | Human  | 2004 | France       |                           | LG SX00000000.1   | (Guimaraes et al., 2016a)        |
| 1       | 131001         | 2.48             | 53.3      | Human  |      |              |                           | NZ_CP010818.1     | 14/09/2015                       |
| 1       | 210931         | 2.51             | 53.3      | Human  |      |              |                           | NZ_CP009583.1     | 22/10/2014                       |
| 1       | 210932         | 2.48             | 53.3      | Human  |      |              |                           | NZ_CP009500.1     | (Viana et al., 2014)             |
| 1       | 2590           | 2.50             | 53.3      | Human  | 2014 | Brazil       | pharyngitis               | MPSS00000000      | This study                       |
| 1       | 4940           | 2.42             | 53.3      | Human  | 2009 | Belarus      | asymptomatic              | LSWN00000000      | This study                       |
| 1       | 809            | 2.50             | 53.3      | Human  | 2000 | Brazil       | fatal pulmonary infection | NC_017317.1       | (Trost et al., 2011)             |
| 1       | FRC58          | 2.54             | 53.3      | Human  |      | France       | bronchitis                | NZ_CP011913.1     | (Silva Ado et al., 2014)         |
| 1       | KZN-2016-48390 | 2.54             | 53.4      | Human  |      | South Africa | throat swab               | MIOS00000000.1    | 10/11/2016                       |
| 1       | 05146          | 2.47             | 53.3      |        |      |              |                           | NZ_CP009716.1     | 28/10/2014                       |
| 2       | 04-7514        | 2.50             | 53.5      | Canine | 2004 | France       |                           | LJVH00000000.1    | (Guimaraes et al., 2016b)        |
| 2       | 131002         | 2.43             | 53.4      | Human  |      |              |                           | NZ_CP011095.1     | 03/04/2015                       |
| 2       | FRC11          | 2.44             | 53.4      | Human  |      | France       | leg ulcer                 | NZ_CP009622       | (Benevides Lde et al., 2015)     |
| 2       | LSPQ-04227     | 2.43             | 53.4      | Human  | 2004 | Canada       |                           | JZUS00000000.1    | (Domingo et al., 2015)           |
| 2       | LSPQ-04228     | 2.44             | 53.4      | Human  | 2013 | Canada       | skin wound                | JZUT00000000.1    | (Domingo et al., 2015)           |
| 2       | NCTC 12077     | 2.62             | 53.4      | Human  |      |              | throat swab               | AYUJ00000000.1    | 25/11/2013                       |

### References

Benevides Lde, J., Viana, M.V., Mariano, D.C., Rocha Fde, S., Bagano, P.C., Folador, E.L., Pereira, F.L., Dorella, F.A., Leal, C.A., Carvalho, A.F., Soares Sde, C., Carneiro, A., Ramos, R., Badell-Ocando, E., Guiso, N., Silva, A., Figueiredo, H., Azevedo, V., Guimaraes, L.C., 2015. Genome Sequence of *Corynebacterium ulcerans* Strain FRC11. Genome Announc 3.

Domingo, M.C., Fournier, E., Masse, C., Charest, H., Bernard, K., Cote, J.C., Tremblay, C., 2015. Draft Genome Sequences of Two Toxigenic *Corynebacterium ulcerans* Strains. *Genome Announc* 3.

Guimaraes, L.C., Viana, M.V., Benevides, L.J., Mariano, D.C., Veras, A.A., Sa, P.H., Rocha, F.S., Vilas Boas, P.C., Soares, S.C., Barbosa, M.S., Guiso, N., Badell, E., Carneiro, A.R., Azevedo, V., Ramos, R.T., Silva, A., 2016a. Draft Genome Sequence of *Corynebacterium ulcerans* Strain 04-3911, Isolated from Humans. *Genome Announc* 4.

Guimaraes, L.C., Viana, M.V., Benevides, L.J., Mariano, D.C., Veras, A.A., Sa, P.H., Rocha, F.S., Vilas Boas, P.C., Soares, S.C., Barbosa, M.S., Guiso, N., Badell, E., Carneiro, A.R., Azevedo, V., Ramos, R.T., Silva, A., 2016b. Draft Genome Sequence of Toxigenic *Corynebacterium ulcerans* Strain 04-7514, Isolated from a Dog in France. *Genome Announc* 4.

Sekizuka, T., Yamamoto, A., Komiya, T., Kenri, T., Takeuchi, F., Shibayama, K., Takahashi, M., Kuroda, M., Iwaki, M., 2012. *Corynebacterium ulcerans* 0102 carries the gene encoding diphtheria toxin on a prophage different from the *C. diphtheriae* NCTC 13129 prophage. *BMC Microbiol* 12, 72.

Silva Ado, S., Barauna, R.A., de Sa, P.C., das Gracias, D.A., Carneiro, A.R., Thouvenin, M., Azevedo, V., Badell, E., Guiso, N., da Silva, A.L., Ramos, R.T., 2014. Draft Genome Sequence of *Corynebacterium ulcerans* FRC58, Isolated from the Bronchitic Aspiration of a Patient in France. *Genome Announc* 2.

Trost, E., Al-Dilaimi, A., Papavasiliou, P., Schneider, J., Viehoveer, P., Burkovski, A., Soares, S.C., Almeida, S.S., Dorella, F.A., Miyoshi, A., Azevedo, V., Schneider, M.P., Silva, A., Santos, C.S., Santos, L.S., Sabbadini, P., Dias, A.A., Hirata, R., Jr., Mattos-Guaraldi, A.L., Tauch, A., 2011. Comparative analysis of two complete *Corynebacterium ulcerans* genomes and detection of candidate virulence factors. *BMC Genomics* 12, 383.

Viana, M.V., de Jesus Benevides, L., Batista Mariano, D.C., de Souza Rocha, F., Bagano Vilas Boas, P.C., Folador, E.L., Pereira, F.L., Alves Dorella, F., Gomes Leal, C.A., Fiorini de Carvalho, A., Silva, A., de Castro Soares, S., Pereira Figueiredo, H.C., Azevedo, V., Guimaraes, L.C., 2014. Genome Sequence of *Corynebacterium ulcerans* Strain 210932. *Genome Announc* 2.
