# Supplementary material for: Genomic analyses reveal two distinct lineages of Corynebacterium ulcerans strains
Source: PubMed Central journal article supplement (PMC6038270; doi:10.1016/j.nmni.2018.05.005), 2018-05-25
Supplement: mmc2.pdf [file mmc2.pdf]

|     |           |                                                                                      |      |   |   |      |             |         |   |   |          |
|-----|-----------|--------------------------------------------------------------------------------------|------|---|---|------|-------------|---------|---|---|----------|
| 65  | 809_02105 | VanW like protein                                                                    | Core |   | Y |      |             |         |   | 1 | Amb      |
| 66  | 809_00361 | hypothetical protein                                                                 | Core |   |   | SpII |             | No      | 2 | 2 | Amb      |
| 67  | 809_00381 | Periplasmic zinc-binding protein TroA precursor                                      | Core |   | Y |      | Lipoprotein | Lipobox |   |   | Sec-Lipo |
| 68  | 809_00880 | hypothetical protein                                                                 | Core |   | Y | SpII |             | Lipobox |   |   | Sec-Lipo |
| 69  | 809_01613 | Fe(3+)-citrate-binding protein YfmC precursor                                        | Core | Y |   |      | Lipoprotein | Lipobox | 1 |   | Sec-Lipo |
| 70  | 809_00078 | hypothetical protein                                                                 | Core | Y | Y | SpII | Lipoprotein |         |   |   | Sec-Lipo |
| 71  | 809_00101 | hypothetical protein                                                                 | Core | Y | Y | SpII | Lipoprotein |         |   |   | Sec-Lipo |
| 72  | 809_00150 | Glycine betaine/carnitine/choline-binding protein OpuCC precursor                    | Core |   | Y | SpII | Lipoprotein |         |   |   | Sec-Lipo |
| 73  | 809_00343 | Thiol-disulfide oxidoreductase ResA                                                  | Core | Y | Y | SpII | Lipoprotein |         |   |   | Sec-Lipo |
| 74  | 809_00426 | putative monoacyl phosphatidylinositol tetramannoside-binding protein LpqW precursor | Core | Y | Y | SpII | Lipoprotein |         |   |   | Sec-Lipo |
| 75  | 809_00445 | Maltose/maltodextrin-binding protein precursor                                       | Core | Y | Y | SpII | Lipoprotein |         |   |   | Sec-Lipo |
| 76  | 809_00501 | hypothetical protein                                                                 | Core | Y | Y | SpII | Lipoprotein |         |   |   | Sec-Lipo |
| 77  | 809_00505 | D-methionine-binding lipoprotein MetQ precursor                                      | Core |   | Y | SpII | Lipoprotein |         |   |   | Sec-Lipo |
| 78  | 809_00506 | D-methionine-binding lipoprotein MetQ precursor                                      | Core | Y | Y | SpII | Lipoprotein |         |   |   | Sec-Lipo |
| 79  | 809_00509 | putative periplasmic iron-binding protein precursor                                  | Core | Y | Y | SpII | Lipoprotein |         |   |   | Sec-Lipo |
| 80  | 809_00521 | Hemin-binding periplasmic protein HmuT precursor                                     | Core | Y | Y | SpII | Lipoprotein |         |   |   | Sec-Lipo |
| 81  | 809_00573 | Trehalose-binding lipoprotein LpqY precursor                                         | Core | Y | Y | SpII | Lipoprotein |         |   |   | Sec-Lipo |
| 82  | 809_00591 | Lipoprotein LpqB precursor                                                           | Core | Y | Y | SpII | Lipoprotein |         |   |   | Sec-Lipo |
| 83  | 809_00623 | hypothetical protein                                                                 | Core | Y | Y | SpII | Lipoprotein |         |   |   | Sec-Lipo |
| 84  | 809_00653 | putative ABC transporter solute-binding protein YclQ precursor                       | Core | Y | Y | SpII | Lipoprotein |         |   |   | Sec-Lipo |
| 85  | 809_00813 | hypothetical protein                                                                 | Core | Y | Y | SpII | Lipoprotein |         |   |   | Sec-Lipo |
| 86  | 809_00839 | Oligopeptide-binding protein OppA precursor                                          | Core | Y | Y | SpII | Lipoprotein |         |   |   | Sec-Lipo |
| 87  | 809_00962 | Vitamin B12-binding protein precursor                                                | Core | Y | Y | SpII | Lipoprotein |         |   |   | Sec-Lipo |
| 88  | 809_00982 | hypothetical protein                                                                 | Core | Y | Y | SpII | Lipoprotein |         |   |   | Sec-Lipo |
| 89  | 809_01004 | Oligopeptide-binding protein AppA precursor                                          | Core | Y | Y | SpII | Lipoprotein |         |   |   | Sec-Lipo |
| 90  | 809_01025 | Glutamine-binding periplasmic protein precursor                                      | Core | Y | Y | SpII | Lipoprotein |         |   |   | Sec-Lipo |
| 91  | 809_01344 | hypothetical protein                                                                 | Core | Y | Y | SpII | Lipoprotein |         |   |   | Sec-Lipo |
| 92  | 809_01549 | hypothetical protein                                                                 | Core | Y | Y | SpII | Lipoprotein |         |   |   | Sec-Lipo |
| 93  | 809_01660 | hypothetical protein                                                                 | Core | Y | Y | SpII | Lipoprotein |         |   |   | Sec-Lipo |
| 94  | 809_01694 | hypothetical protein                                                                 | Core | Y | Y | SpII | Lipoprotein |         |   |   | Sec-Lipo |
| 95  | 809_01702 | Heme-binding protein A precursor                                                     | Core | Y | Y | SpII | Lipoprotein |         |   |   | Sec-Lipo |
| 96  | 809_01789 | Putative L,D-transpeptidase LppS precursor                                           | Core | Y | Y | SpII | Lipoprotein |         |   |   | Sec-Lipo |
| 97  | 809_01870 | Phosphate-binding protein PstS 3 precursor                                           | Core | Y | Y | SpII | Lipoprotein |         |   |   | Sec-Lipo |
| 98  | 809_01911 | hypothetical protein                                                                 | Core | Y | Y | SpII | Lipoprotein |         |   |   | Sec-Lipo |
| 99  | 809_01920 | hypothetical protein                                                                 | Core | Y | Y | SpII | Lipoprotein |         |   |   | Sec-Lipo |
| 100 | 809_02071 | Oligopeptide-binding protein AppA precursor                                          | Core | Y | Y | SpII | Lipoprotein |         |   |   | Sec-Lipo |
| 101 | 809_02079 | corrinoic ABC transporter substrate-binding protein                                  | Core | Y | Y | SpII | Lipoprotein |         |   |   | Sec-Lipo |
| 102 | 809_02106 | Beta-hexosaminidase                                                                  | Core | Y | Y | SpII | Lipoprotein |         |   |   | Sec-Lipo |
| 103 | 809_02126 | hypothetical protein                                                                 | Core | Y | Y | SpII | Lipoprotein |         |   | 1 | Sec-Lipo |
| 104 | 809_02136 | Glycerophosphoryl diester phosphodiesterase precursor                                | Core | Y | Y | SpII | Lipoprotein |         |   |   | Sec-Lipo |
| 105 | 809_02141 | Fe(3+)-citrate-binding protein YfmC precursor                                        | Core | Y | Y | SpII | Lipoprotein |         |   |   | Sec-Lipo |
| 106 | 809_00630 | hypothetical protein                                                                 | Core | Y | Y |      | Lipoprotein | Lipobox |   | 1 | Sec-Lipo |
| 107 | 809_00129 | hypothetical protein                                                                 | Core | Y | Y | SpII |             | Lipobox |   |   | Sec-Lipo |
| 108 | 809_00435 | L-asparaginase precursor                                                             | Core | Y | Y | SpII | Lipoprotein |         |   |   | Sec-Lipo |
| 109 | 809_00651 | Carbonic anhydrase 1                                                                 | Core | Y | Y | SpII | Lipoprotein |         |   |   | Sec-Lipo |
| 110 | 809_00696 | Oligopeptide-binding protein AppA precursor                                          | Core | Y | Y | SpII | Lipoprotein |         |   |   | Sec-Lipo |
| 111 | 809_00784 | Multicopper oxidase mco                                                              | Core |   | Y | SpII | Lipoprotein |         |   |   | Sec-Lipo |
| 112 | 809_00161 | Periplasmic zinc-binding protein TroA precursor                                      | Core | Y | Y |      | Lipoprotein | Lipobox |   |   | Sec-Lipo |
| 113 | 809_00851 | putative monoacyl phosphatidylinositol tetramannoside-binding protein LpqW precursor | Core | Y | Y | SpII |             | No      |   |   | Sec-Spl  |
| 114 | 809_00992 | Esterase PHB depolymerase                                                            | Core | Y | Y | SpII |             | No      |   |   | Sec-Spl  |
| 115 | 809_01992 | ABC transporter glutamine-binding protein GlnH precursor                             | Core | Y | Y | SpII |             | No      |   |   | Sec-Spl  |
| 116 | 809_00039 | Phospholipase D precursor                                                            | Core | Y | Y |      |             |         |   | 1 | Sec-Spl  |
| 117 | 809_00103 | Lysozyme M1 precursor                                                                | Core | Y | Y |      |             |         |   |   | Sec-Spl  |
| 118 | 809_00165 | Periplasmic zinc-binding protein TroA precursor                                      | Core | Y | Y |      |             |         |   |   | Sec-Spl  |
| 119 | 809_00260 | Penicillin-binding protein 1F                                                        | Core | Y | Y |      |             |         |   | 1 | Sec-Spl  |
| 120 | 809_00281 | hypothetical protein                                                                 | Core | Y | Y |      |             |         |   | 1 | Sec-Spl  |
| 121 | 809_00292 | hypothetical protein                                                                 | Core | Y | Y |      |             |         |   |   | Sec-Spl  |
| 122 | 809_00328 | Disulfide bond formation protein D precursor                                         | Core |   | Y |      |             |         |   | 1 | Sec-Spl  |
| 123 | 809_00437 | Major phosphate-irrepressible acid phosphatase precursor                             | Core | Y | Y |      |             |         |   |   | Sec-Spl  |
| 124 | 809_00483 | hypothetical protein                                                                 | Core | Y | Y |      |             |         |   | 1 | Sec-Spl  |
| 125 | 809_00608 | hypothetical protein                                                                 | Core | Y | Y |      |             |         |   | 1 | Sec-Spl  |
| 126 | 809_00641 | hypothetical protein                                                                 | Core | Y | Y |      |             |         |   | 1 | Sec-Spl  |
| 127 | 809_00761 | hypothetical protein                                                                 | Core | Y | Y |      |             |         |   | 1 | Sec-Spl  |
| 128 | 809_00846 | putative peptidase precursor                                                         | Core | Y | Y |      |             |         |   | 1 | Sec-Spl  |
| 129 | 809_00849 | hypothetical protein                                                                 | Core | Y | Y |      |             |         |   | 1 | Sec-Spl  |
| 130 | 809_00909 | hypothetical protein                                                                 | Core | Y | Y |      |             |         |   | 1 | Sec-Spl  |
| 131 | 809_00971 | hypothetical protein                                                                 | Core | Y | Y |      |             |         |   | 1 | Sec-Spl  |

|     |           |                                                                           |      |   |   |    |  |    |         |
|-----|-----------|---------------------------------------------------------------------------|------|---|---|----|--|----|---------|
| 132 | 809_00995 | Cutinase                                                                  | Core | Y | Y |    |  | 1  | Sec-Spl |
| 133 | 809_01184 | Peptidoglycan endopeptidase RipA precursor                                | Core | Y | Y |    |  | 1  | Sec-Spl |
| 134 | 809_01585 | putative endopeptidase precursor                                          | Core | Y | Y |    |  | 1  | Sec-Spl |
| 135 | 809_01586 | putative endopeptidase precursor                                          | Core | Y | Y |    |  |    | Sec-Spl |
| 136 | 809_01629 | hypothetical protein                                                      | Core | Y | Y |    |  | 1  | Sec-Spl |
| 137 | 809_01782 | hypothetical protein                                                      | Core | Y | Y | 1  |  |    | Sec-Spl |
| 138 | 809_01901 | Diacylglycerol acyltransferase/mycolyltransferase Ag85B precursor         | Core | Y | Y |    |  |    | Sec-Spl |
| 139 | 809_01954 | D-alanyl-D-alanine carboxypeptidase DacC precursor                        | Core | Y | Y |    |  | 1  | Sec-Spl |
| 140 | 809_01958 | putative inactive lipase/MT1628                                           | Core | Y | Y |    |  |    | Sec-Spl |
| 141 | 809_02017 | hypothetical protein                                                      | Core | Y | Y |    |  |    | Sec-Spl |
| 142 | 809_02058 | hypothetical protein                                                      | Core | Y | Y |    |  | 1  | Sec-Spl |
| 143 | 809_02059 | Endo-beta-N-acetylglucosaminidase F2 precursor                            | Core | Y | Y |    |  | 1  | Sec-Spl |
| 144 | 809_02125 | Cutinase                                                                  | Core | Y | Y |    |  | 1  | Sec-Spl |
| 145 | 809_02127 | Diacylglycerol acyltransferase/mycolyltransferase Ag85B precursor         | Core | Y | Y |    |  | 1  | Sec-Spl |
| 146 | 809_02129 | Diacylglycerol acyltransferase/mycolyltransferase Ag85C precursor         | Core | Y | Y |    |  | 1  | Sec-Spl |
| 147 | 809_02148 | putative membrane protein/MT3943                                          | Core | Y | Y |    |  | 1  | Sec-Spl |
| 148 | 809_00254 | hypothetical protein                                                      | Core | Y | Y |    |  |    | Sec-Spl |
| 149 | 809_00042 | Ferric enterobactin transport system permease protein FepD                | Core |   |   | 9  |  | 9  | TM      |
| 150 | 809_00044 | Cell division protein CrgA                                                | Core |   |   | 2  |  | 2  | TM      |
| 151 | 809_00045 | Serine/threonine-protein kinase PknB                                      | Core |   |   | 1  |  | 1  | TM      |
| 152 | 809_00048 | Lipid II flippase FtsW                                                    | Core |   |   | 12 |  | 12 | TM      |
| 153 | 809_00050 | FHA domain-containing protein FhaB                                        | Core |   |   | 1  |  | 1  | TM      |
| 154 | 809_00058 | CAAX amino terminal protease self-immunity                                | Core |   |   | 6  |  | 6  | TM      |
| 155 | 809_00060 | hypothetical protein                                                      | Core |   |   | 2  |  | 2  | TM      |
| 156 | 809_00064 | Hemin transport system permease protein HmuU                              | Core |   | Y | 9  |  | 9  | TM      |
| 157 | 809_00065 | Magnesium transporter MgtE                                                | Core |   |   | 5  |  | 5  | TM      |
| 158 | 809_00069 | hypothetical protein                                                      | Core |   | Y | 2  |  | 3  | TM      |
| 159 | 809_00071 | sensory histidine kinase UhpB                                             | Core |   | Y | 4  |  | 4  | TM      |
| 160 | 809_00076 | Anti-sigma-K factor rskA                                                  | Core |   |   | 1  |  | 1  | TM      |
| 161 | 809_00082 | Glycine betaine/carnitine/choline transport system permease protein OpuCB | Core |   | Y | 3  |  | 4  | TM      |
| 162 | 809_00083 | Carnitine transport permease protein OpuCD                                | Core |   |   | 6  |  | 5  | TM      |
| 163 | 809_00105 | VIT family protein                                                        | Core |   |   | 5  |  | 5  | TM      |
| 164 | 809_00122 | hypothetical protein                                                      | Core |   |   | 6  |  | 5  | TM      |
| 165 | 809_00126 | hypothetical protein                                                      | Core |   |   | 4  |  | 4  | TM      |
| 166 | 809_00128 | Putative ammonia monooxygenase                                            | Core |   |   | 10 |  | 10 | TM      |
| 167 | 809_00130 | hypothetical protein                                                      | Core |   |   | 7  |  | 7  | TM      |
| 168 | 809_00132 | Ascorbate-specific permease IIC component UlaA                            | Core |   |   | 11 |  | 11 | TM      |
| 169 | 809_00145 | putative glycerol uptake facilitator protein                              | Core |   |   | 6  |  | 6  | TM      |
| 170 | 809_00149 | hypothetical protein                                                      | Core |   |   | 6  |  | 8  | TM      |
| 171 | 809_00151 | putative arabinosyltransferase C                                          | Core |   |   | 13 |  | 13 | TM      |
| 172 | 809_00152 | Arabinofuranosyltransferase AftA                                          | Core |   |   | 13 |  | 10 | TM      |
| 173 | 809_00156 | hypothetical protein                                                      | Core |   |   | 3  |  | 2  | TM      |
| 174 | 809_00159 | GtrA-like protein                                                         | Core |   |   | 3  |  | 3  | TM      |
| 175 | 809_00163 | Manganese transport system membrane protein MntB                          | Core |   |   | 7  |  | 8  | TM      |
| 176 | 809_00164 | Manganese transport system membrane protein MntB                          | Core |   |   | 9  |  | 9  | TM      |
| 177 | 809_00168 | Teichoic acid translocation permease protein TagG                         | Core |   |   | 6  |  | 6  | TM      |
| 178 | 809_00178 | PTS system glucose-specific EIICBA component                              | Core |   |   | 10 |  | 10 | TM      |
| 179 | 809_00201 | Gnt-II system L-idonate transporter                                       | Core |   |   | 13 |  | 13 | TM      |
| 180 | 809_00211 | Inner membrane permease YgbN                                              | Core |   |   | 12 |  | 11 | TM      |
| 181 | 809_00231 | hypothetical protein                                                      | Core |   |   | 9  |  | 10 | TM      |
| 182 | 809_00232 | hypothetical protein                                                      | Core |   | Y | 7  |  | 8  | TM      |
| 183 | 809_00234 | ABC-2 family transporter protein                                          | Core |   |   | 13 |  | 12 | TM      |
| 184 | 809_00247 | putative monovalent cation/H+ antiporter subunit G                        | Core |   |   | 3  |  | 3  | TM      |
| 185 | 809_00248 | putative monovalent cation/H+ antiporter subunit F                        | Core |   |   | 3  |  | 3  | TM      |
| 186 | 809_00250 | Na(+)/H(+) antiporter subunit D                                           | Core |   |   | 14 |  | 14 | TM      |
| 187 | 809_00251 | Na(+)/H(+) antiporter subunit C1                                          | Core |   | Y | 2  |  | 3  | TM      |
| 188 | 809_00268 | Thiol-disulfide oxidoreductase ResA                                       | Core |   |   | 1  |  | 1  | TM      |
| 189 | 809_00270 | Serine protease                                                           | Core |   | Y | 3  |  | 3  | TM      |
| 190 | 809_00272 | hypothetical protein                                                      | Core |   |   | 2  |  | 2  | TM      |
| 191 | 809_00274 | Phosphoserine phosphatase                                                 | Core |   |   | 1  |  | 1  | TM      |
| 192 | 809_00279 | Bacterial type II secretion system protein F domain protein               | Core |   | Y | 1  |  | 1  | TM      |
| 193 | 809_00280 | hypothetical protein                                                      | Core |   |   | 1  |  | 1  | TM      |
| 194 | 809_00282 | hypothetical protein                                                      | Core |   |   | 1  |  | 1  | TM      |
| 195 | 809_00287 | Adenylate cyclase 2                                                       | Core |   |   | 6  |  | 6  | TM      |
| 196 | 809_00302 | Succinate dehydrogenase/Fumarate reductase transmembrane subunit          | Core |   |   | 5  |  | 5  | TM      |
| 197 | 809_00305 | hypothetical protein                                                      | Core |   |   | 2  |  | 2  | TM      |
| 198 | 809_00306 | hypothetical protein                                                      | Core |   |   | 3  |  | 3  | TM      |

|     |           |                                                               |      |   |    |    |    |
|-----|-----------|---------------------------------------------------------------|------|---|----|----|----|
| 199 | 809_00309 | hypothetical protein                                          | Core |   | 1  | 1  | TM |
| 200 | 809_00329 | Cytochrome C biogenesis protein transmembrane region          | Core |   | 7  | 7  | TM |
| 201 | 809_00336 | hypothetical protein                                          | Core |   | 4  | 4  | TM |
| 202 | 809_00337 | putative copper-exporting P-type ATPase V                     | Core |   | 7  | 7  | TM |
| 203 | 809_00344 | Cytochrome C biogenesis protein transmembrane region          | Core |   | 6  | 6  | TM |
| 204 | 809_00345 | Cytochrome c biogenesis protein Ccs1                          | Core | Y | 3  | 4  | TM |
| 205 | 809_00350 | Cytochrome c biogenesis protein CcsA                          | Core |   | 8  | 8  | TM |
| 206 | 809_00353 | hypothetical protein                                          | Core |   | 2  | 2  | TM |
| 207 | 809_00354 | 1,4-dihydroxy-2-naphthoate octaprenyltransferase              | Core |   | 8  | 6  | TM |
| 208 | 809_00358 | Putative cryptic C4-dicarboxylate transporter DcuD            | Core | Y | 10 | 11 | TM |
| 209 | 809_00371 | preprotein translocase subunit SecE                           | Core |   | 1  | 1  | TM |
| 210 | 809_00384 | Manganese transport system membrane protein MntB              | Core |   | 9  | 8  | TM |
| 211 | 809_00391 | Sensor histidine kinase DesK                                  | Core |   | 7  | 7  | TM |
| 212 | 809_00393 | hypothetical protein                                          | Core |   | 9  | 9  | TM |
| 213 | 809_00394 | hypothetical protein                                          | Core |   | 1  | 1  | TM |
| 214 | 809_00395 | hypothetical protein                                          | Core |   | 9  | 9  | TM |
| 215 | 809_00397 | ABC-2 family transporter protein                              | Core |   | 6  | 6  | TM |
| 216 | 809_00398 | hypothetical protein                                          | Core |   | 3  | 3  | TM |
| 217 | 809_00399 | putative permease                                             | Core |   | 9  | 8  | TM |
| 218 | 809_00409 | hypothetical protein                                          | Core | Y | 1  | 2  | TM |
| 219 | 809_00412 | hypothetical protein                                          | Core |   | 1  | 1  | TM |
| 220 | 809_00428 | Oligopeptide transport system permease protein OppC           | Core |   | 6  | 6  | TM |
| 221 | 809_00429 | Oligopeptide transport system permease protein OppB           | Core | Y | 5  | 4  | TM |
| 222 | 809_00433 | Serine transporter                                            | Core |   | 11 | 11 | TM |
| 223 | 809_00446 | Maltose transport system permease protein MalF                | Core |   | 8  | 8  | TM |
| 224 | 809_00447 | Trehalose transport system permease protein SugB              | Core |   | 6  | 6  | TM |
| 225 | 809_00448 | TraX protein                                                  | Core |   | 8  | 8  | TM |
| 226 | 809_00449 | Nitrite transporter NirC                                      | Core |   | 6  | 6  | TM |
| 227 | 809_00452 | preprotein translocase subunit SecY                           | Core | Y | 9  | 10 | TM |
| 228 | 809_00466 | Putative transmembrane protein (PGPGW)                        | Core |   | 3  | 3  | TM |
| 229 | 809_00482 | Aspartate/alanine antiporter                                  | Core |   | 11 | 11 | TM |
| 230 | 809_00495 | hypothetical protein                                          | Core |   | 11 | 11 | TM |
| 231 | 809_00498 | PspC domain protein                                           | Core |   | 4  | 4  | TM |
| 232 | 809_00499 | nitrate/nitrite sensor protein NarQ                           | Core |   | 5  | 5  | TM |
| 233 | 809_00503 | Methionine import system permease protein MetP                | Core |   | 5  | 5  | TM |
| 234 | 809_00507 | Bacterial membrane flanked domain protein                     | Core |   | 2  | 2  | TM |
| 235 | 809_00511 | Manganese transport system membrane protein MntB              | Core |   | 7  | 7  | TM |
| 236 | 809_00512 | Manganese transport system membrane protein MntB              | Core |   | 9  | 8  | TM |
| 237 | 809_00522 | Hemin transport system permease protein HmuU                  | Core | Y | 8  | 8  | TM |
| 238 | 809_00527 | Inner membrane transport protein YdhP                         | Core |   | 12 | 12 | TM |
| 239 | 809_00530 | hypothetical protein                                          | Core | Y | 1  | 2  | TM |
| 240 | 809_00534 | Inner membrane protein YhjD                                   | Core |   | 7  | 7  | TM |
| 241 | 809_00546 | putative multidrug resistance protein EmrY                    | Core |   | 14 | 14 | TM |
| 242 | 809_00551 | O-acetyltransferase OatA                                      | Core |   | 11 | 11 | TM |
| 243 | 809_00560 | hypothetical protein                                          | Core |   | 2  | 2  | TM |
| 244 | 809_00570 | hypothetical protein                                          | Core |   | 2  | 2  | TM |
| 245 | 809_00571 | Trehalose transport system permease protein SugB              | Core |   | 6  | 6  | TM |
| 246 | 809_00572 | Trehalose transport system permease protein SugA              | Core |   | 6  | 5  | TM |
| 247 | 809_00575 | Transcriptional regulator LytR                                | Core |   | 1  | 1  | TM |
| 248 | 809_00584 | hypothetical protein                                          | Core |   | 1  | 1  | TM |
| 249 | 809_00590 | Sensor histidine kinase MtrB                                  | Core | Y | 1  | 1  | TM |
| 250 | 809_00607 | hypothetical protein                                          | Core |   | 4  | 4  | TM |
| 251 | 809_00609 | hypothetical protein                                          | Core | Y | 1  | 1  | TM |
| 252 | 809_00612 | hypothetical protein                                          | Core |   | 1  | 1  | TM |
| 253 | 809_00625 | hypothetical protein                                          | Core |   | 7  | 7  | TM |
| 254 | 809_00631 | hypothetical protein                                          | Core |   | 10 | 10 | TM |
| 255 | 809_00636 | D-serine/D-alanine/glycine transporter                        | Core |   | 12 | 12 | TM |
| 256 | 809_00646 | p-aminobenzoyl-glutamate transport protein                    | Core |   | 12 | 12 | TM |
| 257 | 809_00648 | Cell division protein FtsX                                    | Core |   | 4  | 4  | TM |
| 258 | 809_00654 | Iron-uptake system permease protein FeuB                      | Core |   | 9  | 8  | TM |
| 259 | 809_00655 | Iron-uptake system permease protein FeuC                      | Core |   | 10 | 10 | TM |
| 260 | 809_00697 | Glutathione transport system permease protein GsiC            | Core |   | 6  | 5  | TM |
| 261 | 809_00712 | Inner membrane protein YccF                                   | Core |   | 3  | 3  | TM |
| 262 | 809_00724 | putative glutamine ABC transporter permease protein GlnM      | Core |   | 3  | 5  | TM |
| 263 | 809_00737 | Signal transduction histidine-protein kinase/phosphatase MprB | Core |   | 2  | 2  | TM |
| 264 | 809_00748 | Putative oxidoreductase MhqP                                  | Core | Y | 2  | 3  | TM |
| 265 | 809_00749 | hypothetical protein                                          | Core |   | 4  | 3  | TM |

|     |           |                                                                       |      |   |    |    |    |
|-----|-----------|-----------------------------------------------------------------------|------|---|----|----|----|
| 266 | 809_00750 | putative dolichyl-phosphate-mannose--protein mannosyltransferase      | Core |   | 11 | 10 | TM |
| 267 | 809_00751 | Glycine betaine transporter BetP                                      | Core |   | 12 | 12 | TM |
| 268 | 809_00752 | hypothetical protein                                                  | Core | Y | 9  | 10 | TM |
| 269 | 809_00763 | hypothetical protein                                                  | Core |   | 1  | 1  | TM |
| 270 | 809_00765 | Nicotinamide mononucleotide transporter                               | Core |   | 7  | 5  | TM |
| 271 | 809_00772 | hypothetical protein                                                  | Core |   | 6  | 6  | TM |
| 272 | 809_00789 | Arginine/ornithine antiporter                                         | Core |   | 13 | 14 | TM |
| 273 | 809_00793 | Cell division protein FtsL                                            | Core |   | 1  | 1  | TM |
| 274 | 809_00799 | Bax inhibitor 1 like protein                                          | Core |   | 7  | 7  | TM |
| 275 | 809_00804 | hypothetical protein                                                  | Core |   | 1  | 1  | TM |
| 276 | 809_00809 | Multidrug resistance protein 3                                        | Core |   | 14 | 14 | TM |
| 277 | 809_00815 | Multidrug resistance protein 3                                        | Core |   | 14 | 14 | TM |
| 278 | 809_00819 | hypothetical protein                                                  | Core |   | 1  | 1  | TM |
| 279 | 809_00823 | hypothetical protein                                                  | Core |   | 3  | 3  | TM |
| 280 | 809_00824 | pheromone autoinducer 2 transporter                                   | Core |   | 8  | 8  | TM |
| 281 | 809_00833 | Putative HMP/thiamine permease protein YkoE                           | Core |   | 6  | 5  | TM |
| 282 | 809_00836 | Energy-coupling factor transporter transmembrane protein EcfT         | Core |   | 6  | 4  | TM |
| 283 | 809_00840 | Dipeptide transport system permease protein DppB                      | Core |   | 6  | 6  | TM |
| 284 | 809_00853 | hypothetical protein                                                  | Core |   | 4  | 4  | TM |
| 285 | 809_00856 | GtrA-like protein                                                     | Core |   | 4  | 4  | TM |
| 286 | 809_00858 | GABA permease                                                         | Core |   | 12 | 12 | TM |
| 287 | 809_00860 | GABA permease                                                         | Core |   | 12 | 12 | TM |
| 288 | 809_00878 | hypothetical protein                                                  | Core |   | 2  | 2  | TM |
| 289 | 809_00890 | Sodium/glucose cotransporter                                          | Core |   | 14 | 14 | TM |
| 290 | 809_00891 | hypothetical protein                                                  | Core |   | 2  | 2  | TM |
| 291 | 809_00897 | hypothetical protein                                                  | Core |   | 4  | 4  | TM |
| 292 | 809_00899 | Sodium/proline symporter                                              | Core |   | 13 | 12 | TM |
| 293 | 809_00906 | PspC domain protein                                                   | Core |   | 1  | 1  | TM |
| 294 | 809_00926 | Decaprenyl-phosphate N-acetylglucosaminophosphotransferase            | Core |   | 11 | 11 | TM |
| 295 | 809_00928 | ATP synthase subunit a                                                | Core |   | 6  | 6  | TM |
| 296 | 809_00929 | ATP synthase subunit c                                                | Core |   | 2  | 2  | TM |
| 297 | 809_00930 | ATP synthase subunit b                                                | Core |   | 1  | 1  | TM |
| 298 | 809_00936 | hypothetical protein                                                  | Core |   | 1  | 1  | TM |
| 299 | 809_00958 | putative multidrug resistance protein EmrY                            | Core |   | 14 | 14 | TM |
| 300 | 809_00960 | Hemin transport system permease protein HmuU                          | Core |   | 10 | 9  | TM |
| 301 | 809_00968 | Arginine exporter protein ArgO                                        | Core |   | 6  | 5  | TM |
| 302 | 809_00974 | Low molecular weight protein antigen 6                                | Core |   | 2  | 1  | TM |
| 303 | 809_00980 | Cadmium, cobalt and zinc/H(+)-K(+) antiporter                         | Core |   | 6  | 6  | TM |
| 304 | 809_00987 | hypothetical protein                                                  | Core |   | 2  | 2  | TM |
| 305 | 809_01000 | Dipeptide transport system permease protein DppB                      | Core |   | 6  | 6  | TM |
| 306 | 809_01001 | Glutathione transport system permease protein GsiD                    | Core |   | 6  | 6  | TM |
| 307 | 809_01013 | hypothetical protein                                                  | Core |   | 1  | 1  | TM |
| 308 | 809_01021 | Sulfite exporter TauE/SafE                                            | Core | Y | 6  | 8  | TM |
| 309 | 809_01024 | Inner membrane amino-acid ABC transporter permease protein YecS       | Core |   | 6  | 4  | TM |
| 310 | 809_01026 | hypothetical protein                                                  | Core |   | 8  | 8  | TM |
| 311 | 809_01032 | PTS system beta-glucoside-specific EIIBC component                    | Core |   | 10 | 11 | TM |
| 312 | 809_01045 | hypothetical protein                                                  | Core |   | 2  | 2  | TM |
| 313 | 809_01069 | hypothetical protein                                                  | Core |   | 1  | 1  | TM |
| 314 | 809_01076 | Di-/tripeptide transporter                                            | Core |   | 14 | 14 | TM |
| 315 | 809_01083 | Anaerobic C4-dicarboxylate transporter DcuB                           | Core |   | 11 | 11 | TM |
| 316 | 809_01085 | Putative esterase                                                     | Core |   | 4  | 4  | TM |
| 317 | 809_01086 | Lysylphosphatidylglycerol biosynthesis bifunctional protein LysX      | Core |   | 12 | 12 | TM |
| 318 | 809_01088 | putative siderophore transport system permease protein YfiZ precursor | Core |   | 9  | 9  | TM |
| 319 | 809_01089 | Fe(3+) dicitrate transport system permease protein FecD               | Core |   | 9  | 9  | TM |
| 320 | 809_01092 | Major Facilitator Superfamily protein                                 | Core | Y | 11 | 11 | TM |
| 321 | 809_01105 | Magnesium and cobalt efflux protein CorC                              | Core | Y | 3  | 4  | TM |
| 322 | 809_01106 | Magnesium and cobalt efflux protein CorC                              | Core |   | 3  | 3  | TM |
| 323 | 809_01110 | Magnesium transport protein CorA                                      | Core |   | 2  | 2  | TM |
| 324 | 809_01115 | NADH dehydrogenase-like protein                                       | Core |   | 1  | 1  | TM |
| 325 | 809_01117 | Inner membrane metabolite transport protein YhjE                      | Core |   | 12 | 12 | TM |
| 326 | 809_01119 | Sodium Bile acid symporter family protein                             | Core |   | 9  | 9  | TM |
| 327 | 809_01126 | Apolipoprotein N-acyltransferase                                      | Core |   | 8  | 7  | TM |
| 328 | 809_01139 | Sec-independent protein translocase protein TatC                      | Core |   | 6  | 6  | TM |
| 329 | 809_01153 | Anaerobic C4-dicarboxylate transporter DcuA                           | Core |   | 11 | 10 | TM |
| 330 | 809_01160 | Undecaprenyl-diphosphatase                                            | Core |   | 6  | 5  | TM |
| 331 | 809_01164 | hypothetical protein                                                  | Core |   | 2  | 2  | TM |
| 332 | 809_01165 | hypothetical protein                                                  | Core |   | 4  | 4  | TM |

|     |           |                                                                                |      |   |    |    |    |
|-----|-----------|--------------------------------------------------------------------------------|------|---|----|----|----|
| 333 | 809_01177 | TVP38/TMEM64 family inner membrane protein YdjZ                                | Core |   | 6  | 6  | TM |
| 334 | 809_01180 | hypothetical protein                                                           | Core | Y | 1  | 2  | TM |
| 335 | 809_01326 | preprotein translocase subunit SecD                                            | Core |   | 6  | 6  | TM |
| 336 | 809_01340 | CDP-diacylglycerol--inositol 3-phosphatidyltransferase                         | Core |   | 3  | 4  | TM |
| 337 | 809_01355 | Alpha-(1->3)-arabinofuranosyltransferase                                       | Core |   | 12 | 10 | TM |
| 338 | 809_01362 | hypothetical protein                                                           | Core |   | 6  | 5  | TM |
| 339 | 809_01365 | hypothetical protein                                                           | Core |   | 2  | 2  | TM |
| 340 | 809_01368 | Polyphosphate glucokinase                                                      | Core |   |    | 1  | TM |
| 341 | 809_01373 | hypothetical protein                                                           | Core |   | 2  | 2  | TM |
| 342 | 809_01385 | hypothetical protein                                                           | Core |   | 5  | 5  | TM |
| 343 | 809_01395 | PTS system fructose-specific EIIABC component                                  | Core |   | 8  | 9  | TM |
| 344 | 809_01400 | Putative pyrimidine permease RutG                                              | Core |   | 12 | 11 | TM |
| 345 | 809_01403 | hypothetical protein                                                           | Core |   | 1  | 1  | TM |
| 346 | 809_01409 | hypothetical protein                                                           | Core |   | 4  | 4  | TM |
| 347 | 809_01413 | Biotin transporter BioY                                                        | Core |   | 6  | 6  | TM |
| 348 | 809_01415 | Energy-coupling factor transporter transmembrane protein EcfT                  | Core |   | 5  | 4  | TM |
| 349 | 809_01419 | Putative CDP-diacylglycerol--glycerol-3-phosphate 3-phosphatidyl-transferase 2 | Core |   | 4  | 4  | TM |
| 350 | 809_01421 | Inner membrane protein alk                                                     | Core |   | 9  | 9  | TM |
| 351 | 809_01422 | DNA translocase SpoIIIE                                                        | Core |   | 4  | 5  | TM |
| 352 | 809_01435 | DNA-damage-inducible protein F                                                 | Core |   | 12 | 12 | TM |
| 353 | 809_01461 | Zinc metalloprotease Rip1                                                      | Core |   | 4  | 4  | TM |
| 354 | 809_01464 | hypothetical protein                                                           | Core |   | 2  | 2  | TM |
| 355 | 809_01466 | hypothetical protein                                                           | Core |   | 2  | 2  | TM |
| 356 | 809_01467 | Phosphatidate cytidyltransferase                                               | Core |   | 8  | 7  | TM |
| 357 | 809_01486 | Signal peptidase I                                                             | Core |   | 1  | 1  | TM |
| 358 | 809_01498 | Signal recognition particle receptor FtsY                                      | Core |   | 1  | 1  | TM |
| 359 | 809_01502 | Amino-acid carrier protein AlST                                                | Core |   | 9  | 9  | TM |
| 360 | 809_01515 | Electron transfer DM13                                                         | Core |   | 1  | 1  | TM |
| 361 | 809_01517 | Prolipoprotein diacylglyceryl transferase                                      | Core |   | 7  | 7  | TM |
| 362 | 809_01519 | Tryptophan-associated transmembrane protein (Trp_oprn_chp)                     | Core | Y | 3  | 4  | TM |
| 363 | 809_01525 | putative transporter                                                           | Core |   | 12 | 12 | TM |
| 364 | 809_01526 | hypothetical protein                                                           | Core |   | 2  | 2  | TM |
| 365 | 809_01531 | hypothetical protein                                                           | Core |   | 4  | 4  | TM |
| 366 | 809_01540 | hypothetical protein                                                           | Core |   | 2  | 2  | TM |
| 367 | 809_01544 | EamA-like transporter family protein                                           | Core | Y | 9  | 9  | TM |
| 368 | 809_01547 | Lipoprotein signal peptidase                                                   | Core |   | 3  | 4  | TM |
| 369 | 809_01555 | YGGT family protein                                                            | Core |   | 3  | 2  | TM |
| 370 | 809_01564 | Phospho-N-acetylmuramoyl-pentapeptide-transferase                              | Core |   | 10 | 10 | TM |
| 371 | 809_01567 | Penicillin-binding protein PbpB                                                | Core |   | 1  | 1  | TM |
| 372 | 809_01568 | Cell division protein FtsL                                                     | Core |   | 1  | 1  | TM |
| 373 | 809_01571 | hypothetical protein                                                           | Core |   | 2  | 2  | TM |
| 374 | 809_01581 | Acyltransferase family protein                                                 | Core |   | 8  | 7  | TM |
| 375 | 809_01587 | Menaquinol-cytochrome c reductase cytochrome b subunit                         | Core |   | 9  | 9  | TM |
| 376 | 809_01589 | Menaquinol-cytochrome c reductase cytochrome c subunit                         | Core |   | 2  | 2  | TM |
| 377 | 809_01590 | Cytochrome c oxidase subunit 3                                                 | Core |   | 5  | 5  | TM |
| 378 | 809_01592 | Cytochrome c oxidase polypeptide 4                                             | Core |   | 3  | 3  | TM |
| 379 | 809_01596 | hypothetical protein                                                           | Core |   | 3  | 2  | TM |
| 380 | 809_01611 | putative siderophore transport system permease protein YfhA                    | Core |   | 8  | 8  | TM |
| 381 | 809_01615 | hypothetical protein                                                           | Core |   | 2  | 2  | TM |
| 382 | 809_01616 | RDD family protein                                                             | Core |   | 2  | 3  | TM |
| 383 | 809_01630 | putative sulfoacetate transporter SauU                                         | Core |   | 12 | 11 | TM |
| 384 | 809_01646 | SURF1 family protein                                                           | Core |   | 2  | 2  | TM |
| 385 | 809_01647 | cobalamin biosynthesis protein                                                 | Core |   | 2  | 1  | TM |
| 386 | 809_01656 | hypothetical protein                                                           | Core |   | 5  | 7  | TM |
| 387 | 809_01663 | Guanyl-specific ribonuclease Sa                                                | Core |   | 1  | 1  | TM |
| 388 | 809_01666 | hypothetical protein                                                           | Core |   | 1  | 1  | TM |
| 389 | 809_01669 | hypothetical protein                                                           | Core |   | 1  | 1  | TM |
| 390 | 809_01673 | VIT family protein                                                             | Core |   | 5  | 4  | TM |
| 391 | 809_01688 | hypothetical protein                                                           | Core |   | 1  | 1  | TM |
| 392 | 809_01695 | Putative multidrug export ATP-binding/permease protein                         | Core |   | 6  | 5  | TM |
| 393 | 809_01696 | Branched-chain amino acid transport system 2 carrier protein                   | Core |   | 12 | 12 | TM |
| 394 | 809_01699 | Glycine betaine transporter OpuD                                               | Core |   | 12 | 12 | TM |
| 395 | 809_01700 | hypothetical protein                                                           | Core |   | 2  | 2  | TM |
| 396 | 809_01701 | Membrane transport protein                                                     | Core | Y | 7  | 8  | TM |
| 397 | 809_01704 | Glutathione transport system permease protein GsiD                             | Core |   | 6  | 6  | TM |
| 398 | 809_01709 | putative inner membrane protein                                                | Core |   | 9  | 8  | TM |
| 399 | 809_01712 | Glutathione transport system permease protein GsiD                             | Core |   | 12 | 12 | TM |

|     |           |                                                                                                            |      |   |    |    |    |
|-----|-----------|------------------------------------------------------------------------------------------------------------|------|---|----|----|----|
| 400 | 809_01714 | Multidrug resistance protein MdtH                                                                          | Core |   | 11 | 11 | TM |
| 401 | 809_01721 | Threonine efflux protein                                                                                   | Core |   | 6  | 6  | TM |
| 402 | 809_01725 | ComE operon protein 1                                                                                      | Core |   | 1  | 1  | TM |
| 403 | 809_01733 | Aspartate/alanine antiporter                                                                               | Core |   | 11 | 10 | TM |
| 404 | 809_01744 | hypothetical protein                                                                                       | Core |   | 3  | 3  | TM |
| 405 | 809_01762 | putative MscS family protein YkuT                                                                          | Core |   | 3  | 3  | TM |
| 406 | 809_01764 | hypothetical protein                                                                                       | Core | Y | 8  | 10 | TM |
| 407 | 809_01774 | hypothetical protein                                                                                       | Core |   | 6  | 5  | TM |
| 408 | 809_01777 | ABC-2 family transporter protein                                                                           | Core |   | 6  | 6  | TM |
| 409 | 809_01779 | Cytochrome c oxidase caa3 assembly factor (Caa3_CtaG)                                                      | Core |   | 16 | 16 | TM |
| 410 | 809_01780 | Carbon starvation protein A                                                                                | Core |   | 16 | 15 | TM |
| 411 | 809_01794 | hypothetical protein                                                                                       | Core |   | 1  | 1  | TM |
| 412 | 809_01800 | Sensor histidine kinase DesK                                                                               | Core | Y | 5  | 5  | TM |
| 413 | 809_01802 | hypothetical protein                                                                                       | Core |   | 8  | 8  | TM |
| 414 | 809_01804 | hypothetical protein                                                                                       | Core |   | 2  | 2  | TM |
| 415 | 809_01805 | hypothetical protein                                                                                       | Core |   | 3  | 3  | TM |
| 416 | 809_01810 | Rhomboid family protein                                                                                    | Core |   | 6  | 6  | TM |
| 417 | 809_01835 | Copper-exporting P-type ATPase A                                                                           | Core |   | 6  | 6  | TM |
| 418 | 809_01838 | Methylamine utilisation protein MauE                                                                       | Core |   | 3  | 3  | TM |
| 419 | 809_01842 | ABC transporter permease YtrF precursor                                                                    | Core |   | 10 | 10 | TM |
| 420 | 809_01860 | Cytochrome bd-I ubiquinol oxidase subunit 2                                                                | Core |   | 9  | 8  | TM |
| 421 | 809_01862 | putative ABC transporter ATP-binding protein                                                               | Core |   | 6  | 5  | TM |
| 422 | 809_01868 | Phosphate transport system permease protein PstA                                                           | Core |   | 6  | 6  | TM |
| 423 | 809_01883 | Haemolysin-III related                                                                                     | Core |   | 7  | 7  | TM |
| 424 | 809_01893 | Ktr system potassium uptake protein B                                                                      | Core |   | 9  | 9  | TM |
| 425 | 809_01897 | putative sensor histidine kinase TcrY                                                                      | Core |   | 2  | 2  | TM |
| 426 | 809_01899 | Antiseptic resistance protein                                                                              | Core |   | 13 | 13 | TM |
| 427 | 809_01902 | Uric acid transporter UacT                                                                                 | Core |   | 13 | 11 | TM |
| 428 | 809_01905 | hypothetical protein                                                                                       | Core |   | 10 | 8  | TM |
| 429 | 809_01908 | hypothetical protein                                                                                       | Core |   | 8  | 8  | TM |
| 430 | 809_01923 | hypothetical protein                                                                                       | Core |   | 1  | 1  | TM |
| 431 | 809_01926 | Inner membrane protein YjjP                                                                                | Core |   | 11 | 10 | TM |
| 432 | 809_01929 | hypothetical protein                                                                                       | Core | Y | 5  | 6  | TM |
| 433 | 809_01934 | hypothetical protein                                                                                       | Core |   | 2  | 2  | TM |
| 434 | 809_01937 | SPFH domain / Band 7 family protein                                                                        | Core |   | 2  | 2  | TM |
| 435 | 809_01939 | Proton glutamate symport protein                                                                           | Core |   | 8  | 8  | TM |
| 436 | 809_01941 | High-affinity choline transport protein                                                                    | Core |   | 12 | 12 | TM |
| 437 | 809_01945 | hypothetical protein                                                                                       | Core |   | 2  | 2  | TM |
| 438 | 809_01946 | hypothetical protein                                                                                       | Core |   | 4  | 4  | TM |
| 439 | 809_01951 | ATP-dependent zinc metalloprotease FtsH                                                                    | Core |   | 2  | 2  | TM |
| 440 | 809_01957 | Aerobic C4-dicarboxylate transport protein                                                                 | Core |   | 6  | 6  | TM |
| 441 | 809_01974 | Na(+)/H(+) antiporter subunit A                                                                            | Core |   | 25 | 25 | TM |
| 442 | 809_01975 | Na(+)/H(+) antiporter subunit C                                                                            | Core |   | 3  | 3  | TM |
| 443 | 809_01976 | Na(+)/H(+) antiporter subunit D                                                                            | Core |   | 13 | 13 | TM |
| 444 | 809_01977 | putative monovalent cation/H+ antiporter subunit E                                                         | Core |   | 2  | 2  | TM |
| 445 | 809_01978 | putative monovalent cation/H+ antiporter subunit F                                                         | Core |   | 3  | 3  | TM |
| 446 | 809_01979 | Na(+)/H(+) antiporter subunit G                                                                            | Core |   | 3  | 3  | TM |
| 447 | 809_01980 | Polyprenol-phosphate-mannose-dependent alpha-(1-2)-phosphatidylinositol pentamannoside mannosyltransferase | Core |   | 11 | 9  | TM |
| 448 | 809_01982 | hypothetical protein                                                                                       | Core |   | 1  | 1  | TM |
| 449 | 809_01987 | putative cardiolipin synthase YwiE                                                                         | Core |   | 2  | 2  | TM |
| 450 | 809_01988 | ABC-2 family transporter protein                                                                           | Core |   | 6  | 6  | TM |
| 451 | 809_01991 | Four helix bundle sensory module for signal transduction                                                   | Core |   | 3  | 4  | TM |
| 452 | 809_02001 | Disulfide bond formation protein DsbB                                                                      | Core |   | 5  | 5  | TM |
| 453 | 809_02016 | hypothetical protein                                                                                       | Core |   | 6  | 3  | TM |
| 454 | 809_02040 | hypothetical protein                                                                                       | Core |   | 12 | 12 | TM |
| 455 | 809_02043 | Sodium/glutamate symporter                                                                                 | Core |   | 13 | 13 | TM |
| 456 | 809_02052 | Putative efflux system component YknX                                                                      | Core |   | 1  | 1  | TM |
| 457 | 809_02066 | Sortase family protein                                                                                     | Core |   | 2  | 2  | TM |
| 458 | 809_02069 | Oligopeptide transport ATP-binding protein OppD                                                            | Core |   | 5  | 5  | TM |
| 459 | 809_02070 | Nickel transport system permease protein NikB                                                              | Core |   | 7  | 6  | TM |
| 460 | 809_02072 | Sulfate permease CysP                                                                                      | Core |   | 12 | 12 | TM |
| 461 | 809_02074 | Filamentous hemagglutinin                                                                                  | Core |   | 6  | 6  | TM |
| 462 | 809_02075 | hypothetical protein                                                                                       | Core |   | 2  | 1  | TM |
| 463 | 809_02078 | Hemin transport system permease protein HmuU                                                               | Core |   | 10 | 10 | TM |
| 464 | 809_02087 | EamA-like transporter family protein                                                                       | Core |   | 10 | 10 | TM |
| 465 | 809_02090 | Lysylphosphatidylglycerol biosynthesis bifunctional protein LysX                                           | Core |   | 6  | 7  | TM |
| 466 | 809_02107 | hypothetical protein                                                                                       | Core |   | 1  | 1  | TM |

|     |           |                                                                        |           |   |   |  |      |                     |    |    |          |         |
|-----|-----------|------------------------------------------------------------------------|-----------|---|---|--|------|---------------------|----|----|----------|---------|
| 467 | 809_02109 | O-acetyltransferase OatA                                               | Core      |   |   |  |      |                     | 9  | 9  |          | TM      |
| 468 | 809_02110 | hypothetical protein                                                   | Core      |   |   |  |      |                     | 2  | 2  |          | TM      |
| 469 | 809_02111 | hypothetical protein                                                   | Core      |   |   |  |      |                     | 12 | 9  |          | TM      |
| 470 | 809_02117 | Membrane protein YdfJ                                                  | Core      |   |   |  |      |                     | 11 | 11 |          | TM      |
| 471 | 809_02118 | hypothetical protein                                                   | Core      |   | Y |  |      |                     | 7  | 8  |          | TM      |
| 472 | 809_02119 | hypothetical protein                                                   | Core      |   | Y |  |      |                     | 3  | 4  |          | TM      |
| 473 | 809_02128 | hypothetical protein                                                   | Core      |   | Y |  |      |                     | 8  | 9  |          | TM      |
| 474 | 809_02130 | hypothetical protein                                                   | Core      |   |   |  |      |                     | 11 | 11 |          | TM      |
| 475 | 809_02137 | Glycerol-3-phosphate transporter                                       | Core      |   |   |  |      |                     | 12 | 12 |          | TM      |
| 476 | 809_02153 | CAAX amino terminal protease self- immunity                            | Core      |   |   |  |      |                     | 7  | 6  |          | TM      |
| 477 | 809_02160 | Nucleoside permease NupX                                               | Core      |   | Y |  |      |                     | 8  | 8  |          | TM      |
| 478 | 809_02168 | Inner membrane transport protein YnfM                                  | Core      |   |   |  |      |                     | 12 | 12 |          | TM      |
| 479 | 809_02176 | Sensor histidine kinase LiaS                                           | Core      |   |   |  |      |                     | 5  | 5  |          | TM      |
| 480 | 809_02178 | hypothetical protein                                                   | Core      |   |   |  |      |                     | 1  | 1  |          | TM      |
| 481 | 809_02179 | Sortase family protein                                                 | Core      |   |   |  |      |                     | 1  | 1  |          | TM      |
| 482 | 809_02180 | Membrane protein insertase MisCA precursor                             | Core      |   |   |  |      |                     | 6  | 6  |          | TM      |
| 483 | 809_02182 | hypothetical protein                                                   | Core      |   |   |  |      |                     | 6  | 6  |          | TM      |
| 484 | 809_02183 | hypothetical protein                                                   | Core      |   |   |  |      |                     | 3  | 3  |          | TM      |
| 485 | 809_01087 | Fe(3+)-citrate-binding protein YfmC precursor                          | Core      | Y |   |  | SplI | Lipoprotein         | 1  | 1  |          | TM-Lipo |
| 486 | 809_01593 | Cytochrome c oxidase subunit 2 precursor                               | Core      |   | Y |  |      | Lipoprotein Lipobox | 2  | 3  |          | TM-Lipo |
| 487 | 809_00041 | Ferric enterobactin transport system permease protein FepG             | Core      | Y | Y |  |      |                     | 8  | 9  |          | TM-Sec  |
| 488 | 809_00253 | hypothetical protein                                                   | Core      | Y | Y |  |      |                     | 5  | 6  |          | TM-Sec  |
| 489 | 809_00455 | Sialidase precursor                                                    | Core      | Y | Y |  |      |                     | 1  | 1  |          | TM-Sec  |
| 490 | 809_00520 | Htaa                                                                   | Core      | Y | Y |  |      |                     | 1  | 2  |          | TM-Sec  |
| 491 | 809_00535 | D-alanyl-D-alanine carboxypeptidase DacB precursor                     | Core      | Y | Y |  |      |                     | 1  | 1  |          | TM-Sec  |
| 492 | 809_00698 | Oligopeptide transport system permease protein OppC                    | Core      | Y | Y |  |      |                     | 5  | 6  |          | TM-Sec  |
| 493 | 809_01678 | Magnesium and cobalt efflux protein CorC                               | Core      | Y | Y |  |      |                     | 2  | 3  |          | TM-Sec  |
| 494 | 809_01837 | hypothetical protein                                                   | Core      | Y |   |  |      |                     | 1  | 1  |          | TM-Sec  |
| 495 | 809_02044 | hypothetical protein                                                   | Core      | Y | Y |  |      |                     | 1  | 1  |          | TM-Sec  |
| 496 | 809_02134 | hypothetical protein                                                   | Core      | Y | Y |  |      |                     | 1  | 2  |          | TM-Sec  |
| 497 | 809_02156 | Htaa                                                                   | Core      | Y | Y |  |      |                     | 1  | 1  |          | TM-Sec  |
| 498 | 809_02064 | hypothetical protein                                                   | Core      | Y | Y |  |      |                     | 1  | 2  | sortaseA | LPXTG   |
| 499 | 809_02065 | hypothetical protein                                                   | Core      | Y | Y |  |      |                     | 1  | 2  | sortaseD | LPXTG   |
| 500 | 809_00055 | Sensor protein VraS                                                    | Accessory |   | Y |  |      |                     | 3  |    |          | Amb     |
| 501 | 809_00088 | hypothetical protein                                                   | Accessory |   |   |  |      |                     | 1  |    |          | Amb     |
| 502 | 809_00217 | hypothetical protein                                                   | Accessory |   |   |  |      |                     |    |    |          | Amb     |
| 503 | 809_00266 | hypothetical protein                                                   | Accessory |   | Y |  |      |                     |    |    | 1        | Amb     |
| 504 | 809_00295 | dTDP-glucose 4,6-dehydratase                                           | Accessory |   | Y |  |      |                     |    |    |          | Amb     |
| 505 | 809_00352 | hypothetical protein                                                   | Accessory |   | Y |  |      |                     |    |    | 1        | Amb     |
| 506 | 809_00484 | tRNA threonylcarbamoyladenine biosynthesis protein TsaB                | Accessory |   | Y |  |      |                     |    |    |          | Amb     |
| 507 | 809_00531 | hypothetical protein                                                   | Accessory |   |   |  |      |                     | 1  |    |          | Amb     |
| 508 | 809_00633 | hypothetical protein                                                   | Accessory |   |   |  |      |                     |    |    |          | Amb     |
| 509 | 809_00669 | Glutamine cyclotransferase                                             | Accessory |   | Y |  |      |                     |    |    |          | Amb     |
| 510 | 809_00686 | hypothetical protein                                                   | Accessory |   | Y |  |      |                     |    |    |          | Amb     |
| 511 | 809_00717 | Murein DD-endopeptidase MepM                                           | Accessory | Y |   |  |      |                     |    |    | 1        | Amb     |
| 512 | 809_00738 | Periplasmic pH-dependent serine endoprotease DegQ precursor            | Accessory |   |   |  |      |                     | 1  |    |          | Amb     |
| 513 | 809_00742 | hypothetical protein                                                   | Accessory |   | Y |  |      |                     |    |    | 1        | Amb     |
| 514 | 809_00777 | Nitronate monooxygenase                                                | Accessory |   | Y |  |      |                     |    |    |          | Amb     |
| 515 | 809_01097 | hypothetical protein                                                   | Accessory |   |   |  |      |                     |    |    | 1        | Amb     |
| 516 | 809_01167 | PTS-dependent dihydroxyacetone kinase, phosphotransferase subunit DhaM | Accessory |   | Y |  |      |                     |    |    |          | Amb     |
| 517 | 809_01194 | hypothetical protein                                                   | Accessory |   | Y |  |      |                     |    |    | 1        | Amb     |
| 518 | 809_01198 | hypothetical protein                                                   | Accessory |   | Y |  |      |                     |    |    |          | Amb     |
| 519 | 809_01204 | hypothetical protein                                                   | Accessory |   |   |  |      |                     | 1  |    |          | Amb     |
| 520 | 809_01304 | putative aminodeoxychorismate lyase                                    | Accessory |   | Y |  |      |                     |    |    | 1        | Amb     |
| 521 | 809_01308 | Phosphotransferase enzyme family protein                               | Accessory |   |   |  |      |                     | 1  |    |          | Amb     |
| 522 | 809_01327 | preprotein translocase subunit YajC                                    | Accessory |   | Y |  |      |                     |    |    | 1        | Amb     |
| 523 | 809_01332 | hypothetical protein                                                   | Accessory |   |   |  |      |                     | 1  |    |          | Amb     |
| 524 | 809_01462 | 1-deoxy-D-xylulose 5-phosphate reductoisomerase                        | Accessory |   | Y |  |      |                     |    |    |          | Amb     |
| 525 | 809_01472 | Peptidase family M23                                                   | Accessory |   | Y |  |      |                     |    |    | 1        | Amb     |
| 526 | 809_01475 | Competence protein ComM                                                | Accessory |   | Y |  |      |                     |    |    |          | Amb     |
| 527 | 809_01478 | Thiamine-phosphate synthase                                            | Accessory |   |   |  |      |                     | 1  |    |          | Amb     |
| 528 | 809_01479 | Hydrogen cyanide synthase subunit HcnC precursor                       | Accessory |   | Y |  |      |                     |    |    |          | Amb     |
| 529 | 809_01545 | hypothetical protein                                                   | Accessory |   | Y |  |      |                     |    |    | 1        | Amb     |
| 530 | 809_01717 | hypothetical protein                                                   | Accessory |   | Y |  |      |                     |    |    |          | Amb     |
| 531 | 809_01740 | hypothetical protein                                                   | Accessory |   | Y |  |      |                     |    |    | 1        | Amb     |
| 532 | 809_01776 | YcaO-like family protein                                               | Accessory |   | Y |  |      |                     |    |    |          | Amb     |
| 533 | 809_02004 | hypothetical protein                                                   | Accessory |   | Y |  |      |                     |    |    | 1        | Amb     |

|     |                 |                                                                        |           |   |   |      |   |   |     |
|-----|-----------------|------------------------------------------------------------------------|-----------|---|---|------|---|---|-----|
| 534 | 809_02008       | Thiol-disulfide oxidoreductase ResA                                    | Accessory | Y | Y |      |   | 1 | Amb |
| 535 | 809_02055       | hypothetical protein                                                   | Accessory |   | Y |      |   |   | Amb |
| 536 | 809_02138       | UDP-galactopyranose mutase                                             | Accessory |   | Y |      |   |   | Amb |
| 537 | 809_02257       | hypothetical protein                                                   | Accessory |   | Y |      |   |   | Amb |
| 538 | 809_02260       | zeta-carotene-forming phytoene desaturase                              | Accessory |   | Y |      |   |   | Amb |
| 539 | BRAD22_01704    | hypothetical protein                                                   | Accessory |   | Y |      |   | 1 | Amb |
| 540 | BRAD22_01735    | hypothetical protein                                                   | Accessory |   | Y |      |   | 1 | Amb |
| 541 | BRAD22_01737    | hypothetical protein                                                   | Accessory |   |   |      | 2 |   | Amb |
| 542 | BRAD22_01741    | Phage-related minor tail protein                                       | Accessory |   |   |      |   | 2 | Amb |
| 543 | BRAD22_01794    | hypothetical protein                                                   | Accessory |   |   |      | 1 |   | Amb |
| 544 | BRAD22_01874    | Phage portal protein                                                   | Accessory |   | Y |      |   |   | Amb |
| 545 | BRAD22_01887    | Tyrosine recombinase XerC                                              | Accessory |   |   |      |   |   | Amb |
| 546 | BRAD22_02013    | hypothetical protein                                                   | Accessory |   | Y |      |   | 1 | Amb |
| 547 | BRAD22_02028    | hypothetical protein                                                   | Accessory |   | Y |      |   |   | Amb |
| 548 | BRAD22_02042    | hypothetical protein                                                   | Accessory |   |   |      | 1 |   | Amb |
| 549 | BRAD22_02343    | hypothetical protein                                                   | Accessory |   | Y |      |   |   | Amb |
| 550 | BRAD22_02416    | hypothetical protein                                                   | Accessory |   | Y |      |   |   | Amb |
| 551 | 0102_00100      | hypothetical protein                                                   | Accessory |   | Y |      |   |   | Amb |
| 552 | 0102_00181      | Helix-turn-helix                                                       | Accessory |   | Y |      |   |   | Amb |
| 553 | 0102_00184      | hypothetical protein                                                   | Accessory |   | Y |      |   | 1 | Amb |
| 554 | 0102_00559      | Phage-related minor tail protein                                       | Accessory |   |   |      |   | 2 | Amb |
| 555 | 0102_01297      | hypothetical protein                                                   | Accessory |   | Y |      |   | 1 | Amb |
| 556 | 0102_01429      | preprotein translocase subunit YajC                                    | Accessory |   | Y |      |   | 1 | Amb |
| 557 | 0102_01795      | hypothetical protein                                                   | Accessory |   |   |      | 1 |   | Amb |
| 558 | 0102_02186      | hypothetical protein                                                   | Accessory |   | Y |      |   |   | Amb |
| 559 | 2590_00023      | Sec-independent protein translocase protein TatAy                      | Accessory |   | Y |      |   | 1 | Amb |
| 560 | 2590_00981      | Epidermin decarboxylase                                                | Accessory |   | Y |      |   |   | Amb |
| 561 | 2590_01065      | Murein DD-endopeptidase MepM                                           | Accessory |   | Y |      |   | 1 | Amb |
| 562 | 2590_01871      | hypothetical protein                                                   | Accessory | Y |   |      |   |   | Amb |
| 563 | BRAD-2649_00099 | hypothetical protein                                                   | Accessory |   | Y |      |   |   | Amb |
| 564 | BRAD-2649_00785 | Signal-transduction histidine kinase senX3                             | Accessory |   | Y |      |   | 1 | Amb |
| 565 | BRAD-2649_00975 | hypothetical protein                                                   | Accessory |   | Y |      |   |   | Amb |
| 566 | BRAD-2649_00977 | Transposase IS116/IS110/IS902 family protein                           | Accessory |   | Y |      |   |   | Amb |
| 567 | BRAD-2649_01068 | Aerobic C4-dicarboxylate transport protein                             | Accessory |   |   |      |   |   | Amb |
| 568 | BRAD-2649_01814 | hypothetical protein                                                   | Accessory |   | Y |      |   | 1 | Amb |
| 569 | BRAD-2649_01815 | hypothetical protein                                                   | Accessory |   | Y |      |   |   | Amb |
| 570 | BRAD-2649_02079 | hypothetical protein                                                   | Accessory |   | Y |      |   |   | Amb |
| 571 | 4940_00155      | hypothetical protein                                                   | Accessory |   |   |      |   |   | Amb |
| 572 | 4940_01941      | Helix-turn-helix domain protein                                        | Accessory |   | Y |      |   |   | Amb |
| 573 | 131001_00055    | hypothetical protein                                                   | Accessory |   | Y |      |   |   | Amb |
| 574 | 131001_00889    | hypothetical protein                                                   | Accessory |   | Y |      |   |   | Amb |
| 575 | 131001_00897    | hypothetical protein                                                   | Accessory |   | Y |      |   |   | Amb |
| 576 | 131002_00157    | hypothetical protein                                                   | Accessory |   | Y |      |   | 1 | Amb |
| 577 | 131002_00252    | hypothetical protein                                                   | Accessory |   | Y |      |   | 1 | Amb |
| 578 | 131002_00336    | hypothetical protein                                                   | Accessory |   | Y |      |   | 1 | Amb |
| 579 | 131002_00522    | putative endopeptidase precursor                                       | Accessory |   | Y |      |   |   | Amb |
| 580 | 131002_00639    | hypothetical protein                                                   | Accessory |   |   |      | 2 |   | Amb |
| 581 | 131002_00648    | Glutamine cyclotransferase                                             | Accessory |   | Y | SplI |   |   | Amb |
| 582 | 131002_00749    | Nitronate monooxygenase                                                | Accessory |   | Y |      |   |   | Amb |
| 583 | 131002_00926    | hypothetical protein                                                   | Accessory |   |   |      |   | 1 | Amb |
| 584 | 131002_01144    | PTS-dependent dihydroxyacetone kinase, phosphotransferase subunit DhaM | Accessory |   | Y |      |   |   | Amb |
| 585 | 131002_01234    | hypothetical protein                                                   | Accessory |   |   |      | 1 |   | Amb |
| 586 | 131002_01402    | Competence protein ComM                                                | Accessory |   | Y |      |   |   | Amb |
| 587 | 131002_01405    | Thiamine-phosphate synthase                                            | Accessory |   |   |      | 1 |   | Amb |
| 588 | 131002_01406    | Hydrogen cyanide synthase subunit HcnC precursor                       | Accessory |   | Y |      |   |   | Amb |
| 589 | 131002_01472    | hypothetical protein                                                   | Accessory |   | Y |      |   | 1 | Amb |
| 590 | 131002_01623    | hypothetical protein                                                   | Accessory |   | Y |      |   | 1 | Amb |
| 591 | 131002_01759    | hypothetical protein                                                   | Accessory |   | Y |      | 1 |   | Amb |
| 592 | 131002_01772    | hypothetical protein                                                   | Accessory |   | Y |      |   |   | Amb |
| 593 | 131002_01937    | hypothetical protein                                                   | Accessory |   | Y |      |   | 1 | Amb |
| 594 | 131002_01990    | hypothetical protein                                                   | Accessory |   | Y |      |   |   | Amb |
| 595 | 210931_01616    | Helix-turn-helix domain protein                                        | Accessory |   | Y |      |   |   | Amb |
| 596 | 210931_02099    | hypothetical protein                                                   | Accessory |   | Y |      |   |   | Amb |
| 597 | 04-3911_02223   | hypothetical protein                                                   | Accessory |   | Y |      |   | 2 | Amb |
| 598 | 04-7514_00218   | hypothetical protein                                                   | Accessory |   | Y |      |   | 1 | Amb |
| 599 | 04-7514_00640   | hypothetical protein                                                   | Accessory |   |   |      | 1 |   | Amb |
| 600 | 04-7514_00657   | putative endopeptidase precursor                                       | Accessory |   | Y |      |   |   | Amb |

|     |                      |                                                                   |           |   |   |  |             |             |         |   |   |              |
|-----|----------------------|-------------------------------------------------------------------|-----------|---|---|--|-------------|-------------|---------|---|---|--------------|
| 601 | 04-7514_00676        | putative propionyl-CoA carboxylase beta chain 5                   | Accessory |   |   |  |             |             |         | 1 |   | Amb          |
| 602 | 04-7514_00859        | hypothetical protein                                              | Accessory | Y |   |  |             |             |         | 1 |   | Amb          |
| 603 | 04-7514_01040        | hypothetical protein                                              | Accessory | Y |   |  |             |             |         |   |   | Amb          |
| 604 | 04-7514_01248        | hypothetical protein                                              | Accessory | Y |   |  |             |             |         |   |   | Amb          |
| 605 | 04-7514_01547        | 1-deoxy-D-xylulose 5-phosphate reductoisomerase                   | Accessory | Y |   |  |             |             |         |   |   | Amb          |
| 606 | 04-7514_02371        | 15-cis-phytoene synthase                                          | Accessory |   |   |  |             |             |         | 1 |   | Amb          |
| 607 | 210932_01997         | hypothetical protein                                              | Accessory |   |   |  |             |             |         | 1 |   | Amb          |
| 608 | FRC11_01252          | hypothetical protein                                              | Accessory | Y |   |  |             |             |         |   |   | Amb          |
| 609 | FRC58_00303          | hypothetical protein                                              | Accessory | Y |   |  |             |             |         |   | 1 | Amb          |
| 610 | FRC58_01683          | YcfA-like protein                                                 | Accessory |   |   |  |             |             |         | 1 |   | Amb          |
| 611 | KZN-2016-48390_00258 | RNA polymerase sigma factor SigA                                  | Accessory |   |   |  |             |             |         |   |   | Amb          |
| 612 | KZN-2016-48390_00260 | hypothetical protein                                              | Accessory | Y |   |  |             |             |         |   |   | Amb          |
| 613 | LSPQ-04227_00246     | UDP-N-acetylmuramoyl-L-alanyl-D-glutamate synthetase              | Accessory |   |   |  |             |             |         |   |   | Amb          |
| 614 | LSPQ-04227_00427     | hypothetical protein                                              | Accessory | Y |   |  |             |             |         |   |   | Amb          |
| 615 | LSPQ-04227_00577     | hypothetical protein                                              | Accessory | Y |   |  |             |             |         |   |   | Amb          |
| 616 | LSPQ-04227_00676     | ATP-dependent DNA helicase UvrD2                                  | Accessory |   |   |  |             |             |         |   |   | Amb          |
| 617 | LSPQ-04227_01176     | hypothetical protein                                              | Accessory | Y |   |  |             |             |         |   |   | Amb          |
| 618 | LSPQ-04227_01652     | hypothetical protein                                              | Accessory | Y |   |  |             |             |         |   |   | Amb          |
| 619 | LSPQ-04227_01739     | YceG-like family protein                                          | Accessory | Y |   |  |             |             |         |   | 1 | Amb          |
| 620 | LSPQ-04227_01821     | hypothetical protein                                              | Accessory | Y |   |  |             |             |         |   | 1 | Amb          |
| 621 | LSPQ-04227_01939     | Copper transporter MctB precursor                                 | Accessory | Y |   |  |             |             |         |   | 1 | Amb          |
| 622 | LSPQ-04227_02153     | hypothetical protein                                              | Accessory | Y |   |  |             |             |         |   |   | Amb          |
| 623 | LSPQ-04227_02328     | Dehydrosqualene desaturase                                        | Accessory | Y |   |  |             |             |         |   |   | Amb          |
| 624 | LSPQ-04228_01067     | hypothetical protein                                              | Accessory | Y |   |  |             |             |         |   | 1 | Amb          |
| 625 | LSPQ-04228_01338     | Helix-turn-helix domain protein                                   | Accessory | Y |   |  |             |             |         |   |   | Amb          |
| 626 | LSPQ-04228_01354     | hypothetical protein                                              | Accessory | Y |   |  |             |             |         |   |   | Amb          |
| 627 | LSPQ-04228_01356     | hypothetical protein                                              | Accessory |   |   |  |             |             |         |   | 1 | Amb          |
| 628 | LSPQ-04228_01950     | hypothetical protein                                              | Accessory | Y |   |  |             |             |         |   | 1 | Amb          |
| 629 | NCTC12077_01414      | hypothetical protein                                              | Accessory |   |   |  |             |             |         |   | 2 | Amb          |
| 630 | NCTC12077_02412      | enterobactin synthase subunit F                                   | Accessory | Y |   |  |             |             |         |   |   | Amb          |
| 631 | BRAD-2649_01020      | hypothetical protein                                              | Accessory | Y |   |  |             |             |         |   | 1 | amb          |
| 632 | 809_00634            | hypothetical protein                                              | Accessory |   |   |  |             |             |         | 2 | 2 | sortaseD Amb |
| 633 | BRAD22_01929         | hypothetical protein                                              | Accessory |   |   |  |             |             |         | 1 | 1 | sortaseD Amb |
| 634 | 4940_01627           | Fimbrial subunit type 1 precursor                                 | Accessory |   |   |  |             |             |         | 1 | 1 | sortaseA Amb |
| 635 | 4940_02225           | hypothetical protein                                              | Accessory |   |   |  |             |             |         | 1 | 1 | sortaseA Amb |
| 636 | 131001_01812         | hypothetical protein                                              | Accessory |   |   |  |             |             |         | 1 | 1 | sortaseD Amb |
| 637 | 210931_01789         | hypothetical protein                                              | Accessory |   |   |  |             |             |         | 1 | 1 | sortaseD Amb |
| 638 | KZN-2016-48390_01941 | Fimbrial subunit type 1 precursor                                 | Accessory |   |   |  |             |             |         | 1 | 1 | sortaseA Amb |
| 639 | LSPQ-04227_02156     | Fimbrial subunit type 1 precursor                                 | Accessory |   |   |  |             |             |         | 1 | 1 | sortaseA Amb |
| 640 | NCTC12077_02488      | hypothetical protein                                              | Accessory |   |   |  |             |             |         | 1 | 1 | sortaseA Amb |
| 641 | LSPQ-04227_00420     | Manganese ABC transporter substrate-binding lipoprotein precursor | Accessory | Y |   |  | Lipoprotein | Lipobox     |         |   |   | Sec-Lipo     |
| 642 | 809_00016            | TMAO reductase system periplasmic protein TorT                    | Accessory | Y | Y |  | SpII        | Lipoprotein |         |   |   | Sec-Lipo     |
| 643 | 809_00043            | putative siderophore-binding lipoprotein YfiY precursor           | Accessory | Y | Y |  | SpII        | Lipoprotein |         |   | 1 | Sec-Lipo     |
| 644 | 809_00062            | corrinoide ABC transporter substrate-binding protein              | Accessory | Y | Y |  | SpII        | Lipoprotein |         |   |   | Sec-Lipo     |
| 645 | 809_00348            | Vitamin B12-binding protein precursor                             | Accessory | Y | Y |  | SpII        | Lipoprotein |         |   |   | Sec-Lipo     |
| 646 | 809_00567            | corrinoide ABC transporter substrate-binding protein              | Accessory | Y | Y |  | SpII        | Lipoprotein |         |   |   | Sec-Lipo     |
| 647 | 809_00679            | Superoxide dismutase [Cu-Zn] precursor                            | Accessory | Y | Y |  | SpII        | Lipoprotein |         |   |   | Sec-Lipo     |
| 648 | 809_00723            | ABC transporter glutamine-binding protein GlnH precursor          | Accessory | Y | Y |  | SpII        | Lipoprotein |         |   |   | Sec-Lipo     |
| 649 | 809_01162            | hypothetical protein                                              | Accessory |   |   |  | SpII        | Lipoprotein |         |   |   | Sec-Lipo     |
| 650 | 809_01324            | Bacterial extracellular solute-binding proteins, family 5 Middle  | Accessory | Y | Y |  | SpII        | Lipoprotein |         |   |   | Sec-Lipo     |
| 651 | 809_01532            | hypothetical protein                                              | Accessory | Y | Y |  | SpII        | Lipoprotein |         |   |   | Sec-Lipo     |
| 652 | 809_01713            | Periplasmic dipeptide transport protein precursor                 | Accessory | Y | Y |  | SpII        | Lipoprotein |         |   |   | Sec-Lipo     |
| 653 | 809_02268            | 3-phenylpropionate/cinnamic acid dioxygenase ferredoxin subunit   | Accessory |   | Y |  | SpII        | Lipoprotein |         |   |   | Sec-Lipo     |
| 654 | BRAD22_01723         | Periplasmic dipeptide transport protein precursor                 | Accessory | Y | Y |  | SpII        | Lipoprotein |         |   |   | Sec-Lipo     |
| 655 | BRAD22_01763         | hypothetical protein                                              | Accessory | Y | Y |  | SpII        | Lipoprotein |         |   |   | Sec-Lipo     |
| 656 | BRAD22_02326         | hypothetical protein                                              | Accessory |   | Y |  | SpII        | Lipoprotein | Lipobox |   | 1 | Sec-Lipo     |
| 657 | 0102_00541           | hypothetical protein                                              | Accessory | Y | Y |  | SpII        | Lipoprotein |         |   |   | Sec-Lipo     |
| 658 | 2590_01059           | hypothetical protein                                              | Accessory | Y | Y |  | SpII        | Lipoprotein |         |   |   | Sec-Lipo     |
| 659 | 2590_01060           | hypothetical protein                                              | Accessory | Y | Y |  | SpII        | Lipoprotein |         |   |   | Sec-Lipo     |
| 660 | 2590_01066           | hypothetical protein                                              | Accessory | Y | Y |  | SpII        | Lipoprotein |         |   |   | Sec-Lipo     |
| 661 | 2590_01483           | corrinoide ABC transporter substrate-binding protein              | Accessory | Y | Y |  | SpII        | Lipoprotein |         |   |   | Sec-Lipo     |
| 662 | BRAD-2649_00980      | Carboxylesterase A precursor                                      | Accessory | Y | Y |  | SpII        | Lipoprotein |         |   |   | Sec-Lipo     |
| 663 | 04-7514_01291        | hypothetical protein                                              | Accessory |   | Y |  | SpII        | Lipoprotein |         |   |   | Sec-Lipo     |
| 664 | LSPQ-04227_00070     | putative siderophore-binding lipoprotein YfiY precursor           | Accessory | Y | Y |  | SpII        | Lipoprotein |         |   | 1 | Sec-Lipo     |
| 665 | LSPQ-04227_01622     | ABC transporter glutamine-binding protein GlnH precursor          | Accessory | Y | Y |  | SpII        | Lipoprotein |         |   |   | Sec-Lipo     |
| 666 | LSPQ-04228_00360     | Lipoprotein LpqB precursor                                        | Accessory | Y | Y |  | SpII        | Lipoprotein |         |   |   | Sec-Lipo     |
| 667 | 0102_00104           | hypothetical protein                                              | Accessory | Y | Y |  | Lipoprotein | Lipobox     |         |   |   | Sec-Lipo     |

|     |                      |                                                                   |           |   |   |      |             |         |   |          |
|-----|----------------------|-------------------------------------------------------------------|-----------|---|---|------|-------------|---------|---|----------|
| 668 | KZN-2016-48390_02092 | hypothetical protein                                              | Accessory | Y | Y |      | Lipoprotein | Lipobox | 1 | Sec-Lipo |
| 669 | 131002_00171         | hypothetical protein                                              | Accessory | Y | Y |      | Lipoprotein | No      |   | Sec-Lipo |
| 670 | LSPQ-04227_00715     | hypothetical protein                                              | Accessory | Y | Y | SplI | Lipoprotein |         |   | Sec-Lipo |
| 671 | 809_02237            | Periplasmic dipeptide transport protein precursor                 | Accessory |   | Y |      | Lipoprotein | Lipobox |   | Sec-Lipo |
| 672 | 809_00014            | hypothetical protein                                              | Accessory | Y | Y |      |             |         | 1 | Sec-Spl  |
| 673 | 809_00091            | hypothetical protein                                              | Accessory | Y | Y |      |             |         | 1 | Sec-Spl  |
| 674 | 809_00102            | Alpha-amylase precursor                                           | Accessory | Y | Y |      |             |         |   | Sec-Spl  |
| 675 | 809_00185            | Ribosome inactivating protein                                     | Accessory | Y | Y |      |             |         | 1 | Sec-Spl  |
| 676 | 809_00186            | hypothetical protein                                              | Accessory | Y | Y |      |             |         | 1 | Sec-Spl  |
| 677 | 809_00189            | hypothetical protein                                              | Accessory | Y | Y |      |             |         |   | Sec-Spl  |
| 678 | 809_00216            | hypothetical protein                                              | Accessory | Y | Y |      |             |         |   | Sec-Spl  |
| 679 | 809_00240            | LGFP repeat protein                                               | Accessory | Y | Y |      |             |         | 1 | Sec-Spl  |
| 680 | 809_00241            | hypothetical protein                                              | Accessory | Y | Y |      |             |         | 1 | Sec-Spl  |
| 681 | 809_00242            | Short repeats of unknown function                                 | Accessory | Y | Y |      |             |         |   | Sec-Spl  |
| 682 | 809_00298            | Diacylglycerol acyltransferase/mycolyltransferase Ag85A precursor | Accessory | Y | Y |      |             |         | 1 | Sec-Spl  |
| 683 | 809_00444            | hypothetical protein                                              | Accessory | Y | Y |      |             |         | 1 | Sec-Spl  |
| 684 | 809_00538            | putative endopeptidase precursor                                  | Accessory | Y | Y |      |             |         |   | Sec-Spl  |
| 685 | 809_00635            | hypothetical protein                                              | Accessory | Y | Y |      |             |         |   | Sec-Spl  |
| 686 | 809_00666            | Resuscitation-promoting factor RpfA precursor                     | Accessory | Y | Y |      |             |         |   | Sec-Spl  |
| 687 | 809_00700            | hypothetical protein                                              | Accessory | Y | Y |      |             |         |   | Sec-Spl  |
| 688 | 809_00800            | hypothetical protein                                              | Accessory | Y | Y |      |             |         | 1 | Sec-Spl  |
| 689 | 809_01303            | Shikimate dehydrogenase                                           | Accessory | Y | Y |      |             |         |   | Sec-Spl  |
| 690 | 809_01783            | Extracellular basic protease precursor                            | Accessory | Y | Y |      |             |         |   | Sec-Spl  |
| 691 | 809_01820            | hypothetical protein                                              | Accessory | Y | Y |      |             |         | 1 | Sec-Spl  |
| 692 | 809_02120            | hypothetical protein                                              | Accessory | Y | Y |      |             |         | 1 | Sec-Spl  |
| 693 | 809_02142            | N-acetylmuramoyl-L-alanine amidase                                | Accessory | Y | Y |      |             |         | 1 | Sec-Spl  |
| 694 | 809_02228            | hypothetical protein                                              | Accessory | Y | Y |      |             |         | 1 | Sec-Spl  |
| 695 | 809_02242            | hypothetical protein                                              | Accessory | Y | Y |      |             |         | 1 | Sec-Spl  |
| 696 | BRAD22_00188         | hypothetical protein                                              | Accessory | Y | Y |      |             |         |   | Sec-Spl  |
| 697 | BRAD22_00249         | Iron deficiency-induced protein A precursor                       | Accessory | Y | Y |      |             |         | 1 | Sec-Spl  |
| 698 | BRAD22_00252         | Alkaline phosphatase synthesis sensor protein PhoR                | Accessory | Y | Y |      |             |         | 1 | Sec-Spl  |
| 699 | BRAD22_00304         | Diacylglycerol acyltransferase/mycolyltransferase Ag85A precursor | Accessory | Y | Y |      |             |         | 1 | Sec-Spl  |
| 700 | BRAD22_00452         | hypothetical protein                                              | Accessory | Y | Y |      |             |         | 1 | Sec-Spl  |
| 701 | BRAD22_00659         | hypothetical protein                                              | Accessory | Y | Y |      |             |         | 1 | Sec-Spl  |
| 702 | BRAD22_00707         | hypothetical protein                                              | Accessory | Y | Y |      |             |         |   | Sec-Spl  |
| 703 | BRAD22_01877         | hypothetical protein                                              | Accessory | Y | Y |      |             |         |   | Sec-Spl  |
| 704 | BRAD22_01918         | hypothetical protein                                              | Accessory | Y | Y |      |             |         | 1 | Sec-Spl  |
| 705 | BRAD22_02180         | Serine-aspartate repeat-containing protein D precursor            | Accessory | Y | Y |      |             |         |   | Sec-Spl  |
| 706 | 0102_00093           | Alpha-amylase precursor                                           | Accessory | Y | Y |      |             |         |   | Sec-Spl  |
| 707 | 0102_00102           | Trypsin                                                           | Accessory | Y | Y |      |             |         |   | Sec-Spl  |
| 708 | 0102_00103           | LGFP repeat protein                                               | Accessory | Y | Y |      |             |         |   | Sec-Spl  |
| 709 | 0102_00218           | Diphtheria toxin, C domain                                        | Accessory | Y | Y |      |             |         |   | Sec-Spl  |
| 710 | 0102_00635           | putative peptidase precursor                                      | Accessory | Y | Y |      |             |         |   | Sec-Spl  |
| 711 | 2590_00672           | hypothetical protein                                              | Accessory | Y | Y |      |             |         | 1 | Sec-Spl  |
| 712 | 2590_00852           | hypothetical protein                                              | Accessory | Y | Y |      |             |         | 1 | Sec-Spl  |
| 713 | 2590_01053           | hypothetical protein                                              | Accessory | Y | Y |      |             |         | 3 | Sec-Spl  |
| 714 | 2590_01055           | Cutinase                                                          | Accessory | Y | Y |      |             |         |   | Sec-Spl  |
| 715 | 2590_01426           | hypothetical protein                                              | Accessory | Y | Y |      |             |         |   | Sec-Spl  |
| 716 | BRAD-2649_00897      | hypothetical protein                                              | Accessory | Y | Y |      |             |         | 1 | Sec-Spl  |
| 717 | BRAD-2649_01344      | hypothetical protein                                              | Accessory | Y | Y |      |             |         | 1 | Sec-Spl  |
| 718 | BRAD-2649_01372      | Htaa                                                              | Accessory | Y | Y |      |             |         |   | Sec-Spl  |
| 719 | BRAD-2649_02265      | hypothetical protein                                              | Accessory | Y | Y |      |             |         | 1 | Sec-Spl  |
| 720 | BRAD-2649_02271      | Htaa                                                              | Accessory | Y | Y |      |             |         |   | Sec-Spl  |
| 721 | 4940_00640           | hypothetical protein                                              | Accessory | Y | Y |      |             |         |   | Sec-Spl  |
| 722 | 4940_01183           | hypothetical protein                                              | Accessory | Y | Y |      |             |         | 1 | Sec-Spl  |
| 723 | 131001_01328         | hypothetical protein                                              | Accessory | Y | Y |      |             |         |   | Sec-Spl  |
| 724 | 131001_02024         | Fimbrial subunit type 1 precursor                                 | Accessory | Y | Y |      |             |         |   | Sec-Spl  |
| 725 | 131002_00065         | META domain protein                                               | Accessory | Y | Y |      |             |         | 1 | Sec-Spl  |
| 726 | 131002_00163         | LGFP repeat protein                                               | Accessory | Y | Y |      |             |         |   | Sec-Spl  |
| 727 | 131002_00676         | hypothetical protein                                              | Accessory | Y | Y |      |             |         |   | Sec-Spl  |
| 728 | 131002_00772         | hypothetical protein                                              | Accessory | Y | Y |      |             |         | 1 | Sec-Spl  |
| 729 | 131002_01229         | Shikimate dehydrogenase                                           | Accessory | Y | Y |      |             |         |   | Sec-Spl  |
| 730 | 131002_02055         | hypothetical protein                                              | Accessory | Y | Y |      |             |         | 1 | Sec-Spl  |
| 731 | 131002_02183         | hypothetical protein                                              | Accessory | Y | Y |      |             |         | 1 | Sec-Spl  |
| 732 | 210931_00246         | hypothetical protein                                              | Accessory | Y | Y |      |             |         |   | Sec-Spl  |
| 733 | 210931_00442         | hypothetical protein                                              | Accessory | Y | Y |      |             |         | 1 | Sec-Spl  |
| 734 | 210931_02095         | hypothetical protein                                              | Accessory | Y | Y |      |             |         |   | Sec-Spl  |

|     |                  |                                                         |           |   |   |  |    |    |         |
|-----|------------------|---------------------------------------------------------|-----------|---|---|--|----|----|---------|
| 735 | 04-7514_00249    | hypothetical protein                                    | Accessory | Y | Y |  |    |    | Sec-Spl |
| 736 | 04-7514_00254    | hypothetical protein                                    | Accessory | Y | Y |  |    |    | Sec-Spl |
| 737 | 04-7514_00643    | Htaa                                                    | Accessory | Y | Y |  |    |    | Sec-Spl |
| 738 | 04-7514_00651    | putative peptidase precursor                            | Accessory | Y | Y |  |    |    | Sec-Spl |
| 739 | 04-7514_01918    | hypothetical protein                                    | Accessory | Y | Y |  |    | 1  | Sec-Spl |
| 740 | 04-7514_02223    | hypothetical protein                                    | Accessory | Y | Y |  |    | 1  | Sec-Spl |
| 741 | 04-7514_02246    | N-acetylmuramoyl-L-alanine amidase                      | Accessory | Y | Y |  |    | 1  | Sec-Spl |
| 742 | FRC11_00091      | hypothetical protein                                    | Accessory | Y | Y |  |    |    | Sec-Spl |
| 743 | FRC11_00093      | hypothetical protein                                    | Accessory | Y | Y |  |    | 1  | Sec-Spl |
| 744 | FRC11_00681      | hypothetical protein                                    | Accessory | Y | Y |  |    |    | Sec-Spl |
| 745 | FRC11_02066      | hypothetical protein                                    | Accessory | Y | Y |  |    | 1  | Sec-Spl |
| 746 | LSPQ-04227_00237 | hypothetical protein                                    | Accessory | Y | Y |  |    |    | Sec-Spl |
| 747 | LSPQ-04227_00302 | hypothetical protein                                    | Accessory | Y | Y |  |    | 1  | Sec-Spl |
| 748 | LSPQ-04227_00480 | hypothetical protein                                    | Accessory | Y | Y |  |    |    | Sec-Spl |
| 749 | LSPQ-04227_00513 | Thermostable alkaline protease precursor                | Accessory | Y | Y |  |    | 1  | Sec-Spl |
| 750 | LSPQ-04227_02278 | hypothetical protein                                    | Accessory | Y | Y |  |    | 1  | Sec-Spl |
| 751 | LSPQ-04228_00209 | Sialidase precursor                                     | Accessory | Y | Y |  |    | 1  | Sec-Spl |
| 752 | LSPQ-04228_00225 | Thermostable alkaline protease precursor                | Accessory | Y | Y |  |    | 1  | Sec-Spl |
| 753 | NCTC12077_02353  | von Willebrand factor type A domain protein             | Accessory | Y | Y |  |    | 1  | Sec-Spl |
| 754 | NCTC12077_02490  | hypothetical protein                                    | Accessory | Y | Y |  |    | 1  | Sec-Spl |
| 755 | NCTC12077_00342  | hypothetical protein                                    | Accessory | Y | Y |  |    | 1  | Sec-Spl |
| 756 | 809_00687        | hypothetical protein                                    | Accessory | Y | Y |  |    | 1  | Sec-Spl |
| 757 | 809_00010        | hypothetical protein                                    | Accessory |   |   |  | 2  | 3  | TM      |
| 758 | 809_00013        | hypothetical protein                                    | Accessory |   |   |  | 9  | 9  | TM      |
| 759 | 809_00017        | Ribose transport system permease protein RbsC           | Accessory |   |   |  | 9  | 9  | TM      |
| 760 | 809_00019        | hypothetical protein                                    | Accessory |   |   |  | 1  | 1  | TM      |
| 761 | 809_00021        | Rhomboid protease GluP                                  | Accessory |   |   |  | 7  | 6  | TM      |
| 762 | 809_00025        | hypothetical protein                                    | Accessory |   |   |  | 3  | 3  | TM      |
| 763 | 809_00049        | PP2C-family Ser/Thr phosphatase                         | Accessory |   |   |  | 1  | 1  | TM      |
| 764 | 809_00053        | ABC-2 family transporter protein                        | Accessory |   |   |  | 6  | 6  | TM      |
| 765 | 809_00067        | hypothetical protein                                    | Accessory |   |   |  | 12 | 12 | TM      |
| 766 | 809_00073        | hypothetical protein                                    | Accessory |   |   |  | 3  | 3  | TM      |
| 767 | 809_00074        | Major Facilitator Superfamily protein                   | Accessory |   |   |  | 12 | 10 | TM      |
| 768 | 809_00080        | Thiol-disulfide oxidoreductase YkuV                     | Accessory |   |   |  | 6  | 6  | TM      |
| 769 | 809_00089        | hypothetical protein                                    | Accessory |   | Y |  | 4  | 4  | TM      |
| 770 | 809_00092        | hypothetical protein                                    | Accessory |   |   |  | 2  | 2  | TM      |
| 771 | 809_00094        | hypothetical protein                                    | Accessory |   | Y |  | 2  | 2  | TM      |
| 772 | 809_00107        | Antiseptic resistance protein                           | Accessory |   |   |  | 14 | 14 | TM      |
| 773 | 809_00138        | Threonine efflux protein                                | Accessory |   |   |  | 6  | 5  | TM      |
| 774 | 809_00166        | phosphatidylglycerophosphatase B                        | Accessory |   |   |  | 6  | 6  | TM      |
| 775 | 809_00176        | Sodium-dependent dicarboxylate transporter SdcS         | Accessory |   |   |  | 15 | 14 | TM      |
| 776 | 809_00188        | hypothetical protein                                    | Accessory |   |   |  | 2  | 2  | TM      |
| 777 | 809_00198        | Membrane protein YdfJ                                   | Accessory |   | Y |  | 11 | 12 | TM      |
| 778 | 809_00226        | Quinolone resistance protein NorB                       | Accessory |   |   |  | 14 | 14 | TM      |
| 779 | 809_00255        | ABC-2 family transporter protein                        | Accessory |   |   |  | 6  | 6  | TM      |
| 780 | 809_00278        | hypothetical protein                                    | Accessory |   | Y |  | 3  | 4  | TM      |
| 781 | 809_00286        | OPT oligopeptide transporter protein                    | Accessory |   |   |  | 18 | 18 | TM      |
| 782 | 809_00290        | hypothetical protein                                    | Accessory |   |   |  | 2  | 2  | TM      |
| 783 | 809_00307        | hypothetical protein                                    | Accessory |   | Y |  | 1  | 2  | TM      |
| 784 | 809_00323        | hypothetical protein                                    | Accessory |   |   |  | 3  | 3  | TM      |
| 785 | 809_00349        | Fe(3+) dicitrate transport system permease protein FecD | Accessory |   |   |  | 10 | 10 | TM      |
| 786 | 809_00382        | hypothetical protein                                    | Accessory | Y |   |  | 1  | 2  | TM      |
| 787 | 809_00386        | hypothetical protein                                    | Accessory |   | Y |  | 1  | 2  | TM      |
| 788 | 809_00408        | hypothetical protein                                    | Accessory |   |   |  | 3  | 3  | TM      |
| 789 | 809_00410        | hypothetical protein                                    | Accessory |   |   |  | 2  | 2  | TM      |
| 790 | 809_00436        | hypothetical protein                                    | Accessory |   |   |  | 2  | 2  | TM      |
| 791 | 809_00465        | ESX-1 secretion system protein eccB1                    | Accessory |   |   |  | 1  | 1  | TM      |
| 792 | 809_00468        | hypothetical protein                                    | Accessory |   |   |  | 11 | 10 | TM      |
| 793 | 809_00469        | ESX-1 secretion system protein EccCa1                   | Accessory |   |   |  | 2  | 1  | TM      |
| 794 | 809_00470        | hypothetical protein                                    | Accessory |   |   |  | 1  | 1  | TM      |
| 795 | 809_00508        | Bacterial membrane flanked domain protein               | Accessory |   |   |  | 4  | 3  | TM      |
| 796 | 809_00516        | hypothetical protein                                    | Accessory |   |   |  | 3  | 3  | TM      |
| 797 | 809_00519        | hypothetical protein                                    | Accessory |   |   |  | 3  | 3  | TM      |
| 798 | 809_00561        | hypothetical protein                                    | Accessory |   |   |  | 6  | 6  | TM      |
| 799 | 809_00562        | hypothetical protein                                    | Accessory |   |   |  | 6  | 6  | TM      |
| 800 | 809_00568        | putative ABC transporter permease protein               | Accessory |   | Y |  | 9  | 9  | TM      |
| 801 | 809_00616        | Voltage-gated potassium channel Kch                     | Accessory |   |   |  | 2  | 2  | TM      |

|     |           |                                                              |           |   |    |    |    |
|-----|-----------|--------------------------------------------------------------|-----------|---|----|----|----|
| 802 | 809_00629 | hypothetical protein                                         | Accessory | Y | 3  | 5  | TM |
| 803 | 809_00632 | Tyrosidine synthase 3                                        | Accessory |   | 7  | 7  | TM |
| 804 | 809_00652 | hypothetical protein                                         | Accessory | Y | 1  | 1  | TM |
| 805 | 809_00662 | hypothetical protein                                         | Accessory |   | 2  | 2  | TM |
| 806 | 809_00668 | hypothetical protein                                         | Accessory |   | 1  | 1  | TM |
| 807 | 809_00671 | Guanine/hypoxanthine permease PbuG                           | Accessory |   | 12 | 13 | TM |
| 808 | 809_00684 | hypothetical protein                                         | Accessory |   | 2  | 2  | TM |
| 809 | 809_00685 | Cation/acetate symporter ActP                                | Accessory |   | 13 | 13 | TM |
| 810 | 809_00689 | Glutathione-regulated potassium-efflux system protein KefC   | Accessory | Y | 13 | 11 | TM |
| 811 | 809_00691 | Multidrug resistance protein NorM                            | Accessory |   | 11 | 11 | TM |
| 812 | 809_00718 | hypothetical protein                                         | Accessory |   | 10 | 10 | TM |
| 813 | 809_00725 | Arginine transport system permease protein ArtQ              | Accessory |   | 6  | 6  | TM |
| 814 | 809_00741 | Large-conductance mechanosensitive channel                   | Accessory |   | 2  | 2  | TM |
| 815 | 809_00747 | hypothetical protein                                         | Accessory |   | 3  | 3  | TM |
| 816 | 809_00785 | C4-dicarboxylate transporter/malic acid transport protein    | Accessory |   | 9  | 9  | TM |
| 817 | 809_00802 | hypothetical protein                                         | Accessory |   | 1  | 1  | TM |
| 818 | 809_00828 | putative ABC transporter ATP-binding protein                 | Accessory |   | 5  | 4  | TM |
| 819 | 809_00829 | putative ABC transporter ATP-binding protein                 | Accessory |   | 6  | 6  | TM |
| 820 | 809_00831 | Inner membrane protein YedI                                  | Accessory |   | 4  | 4  | TM |
| 821 | 809_00841 | Oligopeptide transport system permease protein OppC          | Accessory |   | 6  | 6  | TM |
| 822 | 809_00845 | outer membrane-specific lipoprotein transporter subunit LolE | Accessory |   | 10 | 10 | TM |
| 823 | 809_00882 | Putative multidrug export ATP-binding/permease protein       | Accessory |   | 10 | 11 | TM |
| 824 | 809_00895 | hypothetical protein                                         | Accessory |   | 1  | 1  | TM |
| 825 | 809_00915 | Glycolate permease GlcA                                      | Accessory |   | 13 | 13 | TM |
| 826 | 809_00927 | hypothetical protein                                         | Accessory |   | 4  | 4  | TM |
| 827 | 809_00963 | hypothetical protein                                         | Accessory |   | 4  | 3  | TM |
| 828 | 809_00972 | DoxX                                                         | Accessory |   | 5  | 5  | TM |
| 829 | 809_00975 | putative MscS family protein YkuT                            | Accessory |   | 4  | 3  | TM |
| 830 | 809_00997 | hypothetical protein                                         | Accessory |   | 1  | 1  | TM |
| 831 | 809_00998 | 2-acyl-glycerophospho-ethanolamine acyltransferase           | Accessory |   | 11 | 10 | TM |
| 832 | 809_01103 | hypothetical protein                                         | Accessory |   | 1  | 1  | TM |
| 833 | 809_01113 | hypothetical protein                                         | Accessory | Y | 6  | 6  | TM |
| 834 | 809_01114 | hypothetical protein                                         | Accessory |   | 6  | 6  | TM |
| 835 | 809_01120 | hypothetical protein                                         | Accessory |   | 1  | 1  | TM |
| 836 | 809_01121 | hypothetical protein                                         | Accessory |   | 2  | 2  | TM |
| 837 | 809_01127 | phage T7 F exclusion suppressor FxsA                         | Accessory | Y | 2  | 2  | TM |
| 838 | 809_01132 | Proline-specific permease ProY                               | Accessory |   | 12 | 12 | TM |
| 839 | 809_01140 | Sec-independent protein translocase protein TatAd            | Accessory |   | 1  | 1  | TM |
| 840 | 809_01185 | hypothetical protein                                         | Accessory |   | 1  | 1  | TM |
| 841 | 809_01191 | hypothetical protein                                         | Accessory |   | 2  | 2  | TM |
| 842 | 809_01195 | hypothetical protein                                         | Accessory |   | 4  | 4  | TM |
| 843 | 809_01196 | hypothetical protein                                         | Accessory |   | 2  | 2  | TM |
| 844 | 809_01203 | Phage-related minor tail protein                             | Accessory |   | 2  | 2  | TM |
| 845 | 809_01219 | hypothetical protein                                         | Accessory |   | 4  | 4  | TM |
| 846 | 809_01235 | hypothetical protein                                         | Accessory |   | 1  | 1  | TM |
| 847 | 809_01251 | hypothetical protein                                         | Accessory |   | 12 | 12 | TM |
| 848 | 809_01253 | ABC-2 family transporter protein                             | Accessory |   | 6  | 6  | TM |
| 849 | 809_01254 | Heme A synthase                                              | Accessory |   | 7  | 8  | TM |
| 850 | 809_01255 | Protoheme IX farnesyltransferase                             | Accessory |   | 8  | 9  | TM |
| 851 | 809_01261 | preprotein translocase subunit SecG                          | Accessory | Y | 1  | 2  | TM |
| 852 | 809_01270 | hypothetical protein                                         | Accessory |   | 2  | 2  | TM |
| 853 | 809_01302 | Type IV leader peptidase family protein                      | Accessory |   | 4  | 4  | TM |
| 854 | 809_01310 | Putative neutral zinc metallopeptidase                       | Accessory |   | 1  | 1  | TM |
| 855 | 809_01312 | ABC-2 family transporter protein                             | Accessory |   | 6  | 6  | TM |
| 856 | 809_01320 | Peptidyl-prolyl cis-trans isomerase B                        | Accessory |   | 1  | 1  | TM |
| 857 | 809_01325 | preprotein translocase subunit SecF                          | Accessory |   | 6  | 6  | TM |
| 858 | 809_01334 | hypothetical protein                                         | Accessory | Y | 9  | 10 | TM |
| 859 | 809_01337 | hypothetical protein                                         | Accessory |   | 1  | 1  | TM |
| 860 | 809_01345 | hypothetical protein                                         | Accessory | Y | 1  | 2  | TM |
| 861 | 809_01370 | hypothetical protein                                         | Accessory |   | 2  | 3  | TM |
| 862 | 809_01388 | hypothetical protein                                         | Accessory |   | 1  | 1  | TM |
| 863 | 809_01456 | hypothetical protein                                         | Accessory |   | 8  | 8  | TM |
| 864 | 809_01489 | PTS system mannose-specific EIIBC component                  | Accessory |   | 10 | 9  | TM |
| 865 | 809_01553 | hypothetical protein                                         | Accessory | Y | 1  | 2  | TM |
| 866 | 809_01562 | Lipid II flippase FtsW                                       | Accessory |   | 10 | 8  | TM |
| 867 | 809_01576 | hypothetical protein                                         | Accessory |   | 12 | 11 | TM |
| 868 | 809_01578 | Serine/threonine-protein kinase PknL                         | Accessory |   | 1  | 1  | TM |

|     |           |                                                                                                       |           |   |    |    |    |
|-----|-----------|-------------------------------------------------------------------------------------------------------|-----------|---|----|----|----|
| 869 | 809_01588 | Arsenite oxidase subunit AioB precursor                                                               | Accessory |   | 3  | 3  | TM |
| 870 | 809_01599 | cobalamin synthase                                                                                    | Accessory |   | 6  | 7  | TM |
| 871 | 809_01612 | Fe(3+) dicitrate transport system permease protein FecD                                               | Accessory | Y | 9  | 8  | TM |
| 872 | 809_01621 | hypothetical protein                                                                                  | Accessory |   | 10 | 10 | TM |
| 873 | 809_01625 | Na+/H+ antiporter family protein                                                                      | Accessory | Y | 11 | 11 | TM |
| 874 | 809_01693 | hypothetical protein                                                                                  | Accessory |   | 1  | 1  | TM |
| 875 | 809_01703 | Glutathione transport system permease protein GsiC                                                    | Accessory | Y | 6  | 6  | TM |
| 876 | 809_01710 | FtsX-like permease family protein                                                                     | Accessory | Y | 10 | 10 | TM |
| 877 | 809_01724 | ComEC family competence protein                                                                       | Accessory |   | 11 | 7  | TM |
| 878 | 809_01732 | Inner membrane protein YbaN                                                                           | Accessory | Y | 3  | 2  | TM |
| 879 | 809_01741 | hypothetical protein                                                                                  | Accessory |   | 4  | 4  | TM |
| 880 | 809_01819 | hypothetical protein                                                                                  | Accessory |   | 2  | 2  | TM |
| 881 | 809_01821 | Cytochrome c oxidase subunit 1                                                                        | Accessory |   | 12 | 12 | TM |
| 882 | 809_01840 | camphor resistance protein CrcB                                                                       | Accessory | Y | 3  | 4  | TM |
| 883 | 809_01841 | Putative fluoride ion transporter CrcB                                                                | Accessory | Y | 3  | 4  | TM |
| 884 | 809_01859 | Cytochrome bd-I ubiquinol oxidase subunit 1                                                           | Accessory |   | 9  | 9  | TM |
| 885 | 809_01861 | ATP-binding/permease protein CydD                                                                     | Accessory |   | 6  | 5  | TM |
| 886 | 809_01869 | Phosphate transport system permease protein PstC                                                      | Accessory |   | 6  | 6  | TM |
| 887 | 809_01930 | Multidrug resistance protein stp                                                                      | Accessory |   | 14 | 14 | TM |
| 888 | 809_01960 | Linear gramicidin synthase subunit D                                                                  | Accessory |   | 6  | 5  | TM |
| 889 | 809_02002 | hypothetical protein                                                                                  | Accessory | Y | 1  | 2  | TM |
| 890 | 809_02003 | hypothetical protein                                                                                  | Accessory | Y | 7  | 8  | TM |
| 891 | 809_02009 | Cytochrome c biogenesis protein CcsA                                                                  | Accessory |   | 8  | 8  | TM |
| 892 | 809_02010 | Cytochrome c biogenesis protein CcsB                                                                  | Accessory |   | 4  | 4  | TM |
| 893 | 809_02011 | Tetratricopeptide repeat protein                                                                      | Accessory |   | 1  | 1  | TM |
| 894 | 809_02012 | Cytochrome c-552 precursor                                                                            | Accessory |   | 1  | 1  | TM |
| 895 | 809_02013 | Cytochrome c-type protein NrfH                                                                        | Accessory |   | 1  | 1  | TM |
| 896 | 809_02018 | hypothetical protein                                                                                  | Accessory |   | 4  | 4  | TM |
| 897 | 809_02019 | hypothetical protein                                                                                  | Accessory |   | 6  | 6  | TM |
| 898 | 809_02021 | hypothetical protein                                                                                  | Accessory |   | 2  | 2  | TM |
| 899 | 809_02032 | hypothetical protein                                                                                  | Accessory |   | 7  | 7  | TM |
| 900 | 809_02035 | Sortase family protein                                                                                | Accessory |   | 2  | 2  | TM |
| 901 | 809_02037 | Sortase family protein                                                                                | Accessory |   | 2  | 2  | TM |
| 902 | 809_02046 | CAAX amino terminal protease self- immunity                                                           | Accessory |   | 6  | 6  | TM |
| 903 | 809_02047 | hypothetical protein                                                                                  | Accessory |   | 4  | 3  | TM |
| 904 | 809_02049 | Acyltransferase family protein                                                                        | Accessory |   | 10 | 10 | TM |
| 905 | 809_02050 | Macrolide export ATP-binding/permease protein MacB                                                    | Accessory |   | 4  | 4  | TM |
| 906 | 809_02067 | pheromone autoinducer 2 transporter                                                                   | Accessory |   | 8  | 8  | TM |
| 907 | 809_02089 | YibE/F-like protein                                                                                   | Accessory |   | 8  | 8  | TM |
| 908 | 809_02092 | hypothetical protein                                                                                  | Accessory |   | 6  | 6  | TM |
| 909 | 809_02099 | Iron import ATP-binding/permease protein IrtB                                                         | Accessory |   | 5  | 5  | TM |
| 910 | 809_02100 | Iron import ATP-binding/permease protein IrtA                                                         | Accessory |   | 6  | 5  | TM |
| 911 | 809_02102 | Energy-coupling factor transporter transmembrane protein EcfT                                         | Accessory | Y | 5  | 5  | TM |
| 912 | 809_02103 | hypothetical protein                                                                                  | Accessory |   | 1  | 1  | TM |
| 913 | 809_02104 | hypothetical protein                                                                                  | Accessory |   | 4  | 4  | TM |
| 914 | 809_02135 | Putative undecaprenyl-diphosphatase YbjG                                                              | Accessory |   | 5  | 3  | TM |
| 915 | 809_02154 | Transcriptional regulator LytR                                                                        | Accessory |   | 1  | 1  | TM |
| 916 | 809_02157 | Amino-acid carrier protein AlST                                                                       | Accessory |   | 11 | 10 | TM |
| 917 | 809_02171 | Polyprenol-phosphate-mannose-dependent alpha-(1-2)-phosphatidylinositol mannoside mannosyltransferase | Accessory |   | 12 | 13 | TM |
| 918 | 809_02197 | Copper-exporting P-type ATPase A                                                                      | Accessory |   | 8  | 8  | TM |
| 919 | 809_02205 | hypothetical protein                                                                                  | Accessory | Y | 1  | 2  | TM |
| 920 | 809_02206 | hypothetical protein                                                                                  | Accessory |   | 10 | 9  | TM |
| 921 | 809_02207 | Penicillin-binding protein 1A                                                                         | Accessory |   | 1  | 1  | TM |
| 922 | 809_02212 | hypothetical protein                                                                                  | Accessory |   | 3  | 3  | TM |
| 923 | 809_02214 | Inner membrane protein YqjA                                                                           | Accessory |   | 4  | 4  | TM |
| 924 | 809_02220 | ABC-2 family transporter protein                                                                      | Accessory |   | 6  | 6  | TM |
| 925 | 809_02221 | hypothetical protein                                                                                  | Accessory |   | 5  | 5  | TM |
| 926 | 809_02224 | FtsX-like permease family protein                                                                     | Accessory |   | 4  | 4  | TM |
| 927 | 809_02226 | Sensor histidine kinase LiaS                                                                          | Accessory |   | 5  | 5  | TM |
| 928 | 809_02229 | VanZ like family protein                                                                              | Accessory |   | 5  | 5  | TM |
| 929 | 809_02239 | Oligopeptide transport ATP-binding protein OppD                                                       | Accessory |   | 5  | 5  | TM |
| 930 | 809_02243 | Tyrosine-specific transport protein                                                                   | Accessory |   | 11 | 11 | TM |
| 931 | 809_02248 | putative amino acid permease YhdG                                                                     | Accessory |   | 12 | 12 | TM |
| 932 | 809_02258 | Aerobic C4-dicarboxylate transport protein                                                            | Accessory | Y | 9  | 10 | TM |
| 933 | 809_02269 | Sodium Bile acid symporter family protein                                                             | Accessory |   | 9  | 9  | TM |
| 934 | 809_02271 | Branched-chain amino acid transport protein (AzID)                                                    | Accessory |   | 4  | 4  | TM |
| 935 | 809_02272 | Inner membrane protein YgaZ                                                                           | Accessory |   | 6  | 4  | TM |

|      |              |                                                           |           |   |    |    |    |
|------|--------------|-----------------------------------------------------------|-----------|---|----|----|----|
| 936  | 809_02276    | hypothetical protein                                      | Accessory |   | 2  | 1  | TM |
| 937  | 809_02277    | putative peptidoglycan biosynthesis protein MviN          | Accessory |   | 15 | 15 | TM |
| 938  | BRAD22_00057 | hypothetical protein                                      | Accessory |   | 4  | 3  | TM |
| 939  | BRAD22_00061 | Sensor histidine kinase DesK                              | Accessory |   | 5  | 5  | TM |
| 940  | BRAD22_00062 | CAAX amino terminal protease self- immunity               | Accessory |   | 8  | 8  | TM |
| 941  | BRAD22_00192 | hypothetical protein                                      | Accessory |   | 1  | 1  | TM |
| 942  | BRAD22_00226 | Quinolone resistance protein NorB                         | Accessory |   | 14 | 14 | TM |
| 943  | BRAD22_00248 | hypothetical protein                                      | Accessory |   | 14 | 12 | TM |
| 944  | BRAD22_00250 | Glycerol-3-phosphate transporter                          | Accessory |   | 12 | 12 | TM |
| 945  | BRAD22_00504 | hypothetical protein                                      | Accessory |   | 6  | 6  | TM |
| 946  | BRAD22_00528 | hypothetical protein                                      | Accessory |   | 1  | 1  | TM |
| 947  | BRAD22_00637 | hypothetical protein                                      | Accessory | Y | 3  | 4  | TM |
| 948  | BRAD22_00710 | hypothetical protein                                      | Accessory |   | 1  | 1  | TM |
| 949  | BRAD22_00711 | hypothetical protein                                      | Accessory |   | 1  | 1  | TM |
| 950  | BRAD22_01203 | hypothetical protein                                      | Accessory |   | 4  | 4  | TM |
| 951  | BRAD22_01736 | hypothetical protein                                      | Accessory |   | 4  | 4  | TM |
| 952  | BRAD22_01785 | hypothetical protein                                      | Accessory |   | 1  | 1  | TM |
| 953  | BRAD22_01867 | hypothetical protein                                      | Accessory |   | 1  | 1  | TM |
| 954  | BRAD22_01876 | hypothetical protein                                      | Accessory | Y | 1  | 1  | TM |
| 955  | BRAD22_01884 | hypothetical protein                                      | Accessory |   | 6  | 5  | TM |
| 956  | BRAD22_01919 | Cytochrome c oxidase subunit 1                            | Accessory |   | 12 | 12 | TM |
| 957  | BRAD22_01930 | hypothetical protein                                      | Accessory |   | 1  | 1  | TM |
| 958  | BRAD22_02014 | hypothetical protein                                      | Accessory |   | 4  | 4  | TM |
| 959  | BRAD22_02015 | hypothetical protein                                      | Accessory |   | 2  | 2  | TM |
| 960  | BRAD22_02043 | SPFH domain / Band 7 family protein                       | Accessory |   | 2  | 2  | TM |
| 961  | BRAD22_02055 | hypothetical protein                                      | Accessory |   | 1  | 1  | TM |
| 962  | BRAD22_02063 | hypothetical protein                                      | Accessory |   | 1  | 1  | TM |
| 963  | BRAD22_02093 | hypothetical protein                                      | Accessory |   | 1  | 1  | TM |
| 964  | BRAD22_02162 | hypothetical protein                                      | Accessory |   | 1  | 1  | TM |
| 965  | BRAD22_02193 | Sortase family protein                                    | Accessory |   | 2  | 2  | TM |
| 966  | BRAD22_02202 | Macrolide export ATP-binding/permease protein MacB        | Accessory |   | 4  | 4  | TM |
| 967  | BRAD22_02309 | Amino-acid carrier protein AlsT                           | Accessory |   | 11 | 10 | TM |
| 968  | BRAD22_02310 | O-acetyltransferase OatA                                  | Accessory |   | 11 | 9  | TM |
| 969  | BRAD22_02387 | VanZ like family protein                                  | Accessory |   | 5  | 5  | TM |
| 970  | BRAD22_02388 | hypothetical protein                                      | Accessory |   | 3  | 3  | TM |
| 971  | 0102_00072   | Major Facilitator Superfamily protein                     | Accessory |   | 10 | 8  | TM |
| 972  | 0102_00092   | hypothetical protein                                      | Accessory |   | 2  | 2  | TM |
| 973  | 0102_00098   | Antiseptic resistance protein                             | Accessory |   | 9  | 8  | TM |
| 974  | 0102_00106   | hypothetical protein                                      | Accessory |   | 4  | 4  | TM |
| 975  | 0102_00179   | hypothetical protein                                      | Accessory |   | 1  | 1  | TM |
| 976  | 0102_00215   | hypothetical protein                                      | Accessory |   | 2  | 2  | TM |
| 977  | 0102_00216   | hypothetical protein                                      | Accessory |   | 4  | 4  | TM |
| 978  | 0102_00217   | hypothetical protein                                      | Accessory |   | 1  | 1  | TM |
| 979  | 0102_00294   | hypothetical protein                                      | Accessory |   | 1  | 1  | TM |
| 980  | 0102_00504   | ESX-1 secretion system protein eccB1                      | Accessory |   | 1  | 1  | TM |
| 981  | 0102_00508   | hypothetical protein                                      | Accessory |   | 2  | 1  | TM |
| 982  | 0102_00510   | hypothetical protein                                      | Accessory |   | 1  | 1  | TM |
| 983  | 0102_00565   | hypothetical protein                                      | Accessory |   | 1  | 1  | TM |
| 984  | 0102_01097   | putative type I restriction enzyme P M protein            | Accessory |   | 1  | 1  | TM |
| 985  | 0102_01195   | hypothetical protein                                      | Accessory |   | 3  | 3  | TM |
| 986  | 0102_01205   | hypothetical protein                                      | Accessory |   | 1  | 1  | TM |
| 987  | 0102_01298   | hypothetical protein                                      | Accessory |   | 4  | 4  | TM |
| 988  | 0102_01342   | hypothetical protein                                      | Accessory |   | 2  | 2  | TM |
| 989  | 0102_01722   | hypothetical protein                                      | Accessory |   | 6  | 6  | TM |
| 990  | 0102_01726   | Na <sup>+</sup> /H <sup>+</sup> antiporter family protein | Accessory | Y | 11 | 11 | TM |
| 991  | 0102_01935   | hypothetical protein                                      | Accessory |   | 1  | 1  | TM |
| 992  | 0102_02133   | hypothetical protein                                      | Accessory |   | 7  | 7  | TM |
| 993  | 0102_02289   | hypothetical protein                                      | Accessory |   | 10 | 9  | TM |
| 994  | 0102_02296   | Copper-exporting P-type ATPase A                          | Accessory |   | 8  | 8  | TM |
| 995  | 2590_00457   | hypothetical protein                                      | Accessory |   | 1  | 1  | TM |
| 996  | 2590_00973   | hypothetical protein                                      | Accessory |   | 4  | 4  | TM |
| 997  | 2590_00974   | hypothetical protein                                      | Accessory | Y | 3  | 2  | TM |
| 998  | 2590_00989   | putative ABC transporter permease protein                 | Accessory | Y | 9  | 9  | TM |
| 999  | 2590_01054   | hypothetical protein                                      | Accessory |   | 1  | 1  | TM |
| 1000 | 2590_01057   | TrbC/VIRB2 family protein                                 | Accessory |   | 2  | 2  | TM |
| 1001 | 2590_01058   | hypothetical protein                                      | Accessory |   | 2  | 2  | TM |
| 1002 | 2590_01062   | hypothetical protein                                      | Accessory |   | 2  | 2  | TM |

|      |                 |                                                    |           |   |    |    |    |
|------|-----------------|----------------------------------------------------|-----------|---|----|----|----|
| 1003 | 2590_01067      | TraM recognition site of TraD and TraG             | Accessory |   | 2  | 2  | TM |
| 1004 | 2590_01069      | hypothetical protein                               | Accessory |   | 1  | 1  | TM |
| 1005 | 2590_01481      | Hemin transport system permease protein HmuU       | Accessory | Y | 7  | 8  | TM |
| 1006 | 2590_01489      | hypothetical protein                               | Accessory |   | 2  | 2  | TM |
| 1007 | 2590_01533      | Threonine efflux protein                           | Accessory |   | 6  | 5  | TM |
| 1008 | 2590_01557      | hypothetical protein                               | Accessory |   | 4  | 4  | TM |
| 1009 | 2590_01634      | hypothetical protein                               | Accessory |   | 1  | 1  | TM |
| 1010 | 2590_01636      | hypothetical protein                               | Accessory |   | 1  | 1  | TM |
| 1011 | 2590_01704      | putative amino acid permease YhdG                  | Accessory |   | 12 | 12 | TM |
| 1012 | 2590_01873      | hypothetical protein                               | Accessory |   | 1  | 1  | TM |
| 1013 | 2590_02237      | hypothetical protein                               | Accessory |   | 1  | 1  | TM |
| 1014 | BRAD-2649_00127 | hypothetical protein                               | Accessory |   | 5  | 5  | TM |
| 1015 | BRAD-2649_00447 | hypothetical protein                               | Accessory |   | 2  | 1  | TM |
| 1016 | BRAD-2649_00473 | Tyrocidine synthase 3                              | Accessory |   | 6  | 7  | TM |
| 1017 | BRAD-2649_00857 | Putative pseudouridine transporter                 | Accessory |   | 2  | 2  | TM |
| 1018 | BRAD-2649_00927 | YibE/F-like protein                                | Accessory |   | 8  | 8  | TM |
| 1019 | BRAD-2649_00966 | Macrolide export ATP-binding/permease protein MacB | Accessory |   | 4  | 4  | TM |
| 1020 | BRAD-2649_00969 | hypothetical protein                               | Accessory |   | 4  | 4  | TM |
| 1021 | BRAD-2649_00973 | Antiseptic resistance protein                      | Accessory |   | 14 | 12 | TM |
| 1022 | BRAD-2649_00992 | Sortase family protein                             | Accessory |   | 2  | 2  | TM |
| 1023 | BRAD-2649_00994 | Sortase family protein                             | Accessory |   | 2  | 2  | TM |
| 1024 | BRAD-2649_00997 | hypothetical protein                               | Accessory |   | 2  | 2  | TM |
| 1025 | BRAD-2649_00998 | hypothetical protein                               | Accessory |   | 1  | 1  | TM |
| 1026 | BRAD-2649_01012 | hypothetical protein                               | Accessory |   | 4  | 4  | TM |
| 1027 | BRAD-2649_01063 | hypothetical protein                               | Accessory |   | 1  | 1  | TM |
| 1028 | BRAD-2649_01064 | Linear gramicidin synthase subunit D               | Accessory |   | 6  | 5  | TM |
| 1029 | BRAD-2649_01122 | hypothetical protein                               | Accessory |   | 1  | 1  | TM |
| 1030 | BRAD-2649_01136 | Sodium-dependent dicarboxylate transporter SdcS    | Accessory | Y | 10 | 10 | TM |
| 1031 | BRAD-2649_01231 | hypothetical protein                               | Accessory |   | 3  | 2  | TM |
| 1032 | BRAD-2649_01343 | tryptophan permease                                | Accessory |   | 7  | 7  | TM |
| 1033 | BRAD-2649_01356 | hypothetical protein                               | Accessory |   | 3  | 3  | TM |
| 1034 | BRAD-2649_01371 | hypothetical protein                               | Accessory |   | 1  | 1  | TM |
| 1035 | BRAD-2649_01566 | Inner membrane protein YedI                        | Accessory |   | 4  | 4  | TM |
| 1036 | BRAD-2649_01648 | hypothetical protein                               | Accessory |   | 2  | 2  | TM |
| 1037 | BRAD-2649_01816 | TM2 domain protein                                 | Accessory |   | 2  | 1  | TM |
| 1038 | BRAD-2649_01826 | hypothetical protein                               | Accessory |   | 1  | 1  | TM |
| 1039 | BRAD-2649_01841 | hypothetical protein                               | Accessory |   | 2  | 2  | TM |
| 1040 | BRAD-2649_02264 | DNA-binding transcriptional activator PspC         | Accessory |   | 1  | 1  | TM |
| 1041 | BRAD-2649_02270 | hypothetical protein                               | Accessory |   | 1  | 1  | TM |
| 1042 | BRAD-2649_02272 | Htaa                                               | Accessory |   | 1  | 1  | TM |
| 1043 | BRAD-2649_02322 | camphor resistance protein CrcB                    | Accessory | Y | 3  | 4  | TM |
| 1044 | BRAD-2649_02328 | Phage-related minor tail protein                   | Accessory |   | 2  | 2  | TM |
| 1045 | 4940_01304      | PP2C-family Ser/Thr phosphatase                    | Accessory |   | 1  | 1  | TM |
| 1046 | 4940_01546      | hypothetical protein                               | Accessory |   | 3  | 3  | TM |
| 1047 | 4940_01622      | hypothetical protein                               | Accessory |   | 7  | 7  | TM |
| 1048 | 4940_01624      | hypothetical protein                               | Accessory | Y | 1  | 1  | TM |
| 1049 | 4940_01940      | hypothetical protein                               | Accessory |   | 1  | 1  | TM |
| 1050 | 4940_02202      | Arsenite oxidase subunit AioB precursor            | Accessory |   | 3  | 3  | TM |
| 1051 | 131001_00093    | hypothetical protein                               | Accessory |   | 2  | 2  | TM |
| 1052 | 131001_00170    | hypothetical protein                               | Accessory |   | 1  | 1  | TM |
| 1053 | 131001_00552    | Major Facilitator Superfamily protein              | Accessory |   | 12 | 12 | TM |
| 1054 | 131001_01330    | hypothetical protein                               | Accessory |   | 5  | 5  | TM |
| 1055 | 131001_01442    | hypothetical protein                               | Accessory |   | 8  | 8  | TM |
| 1056 | 131001_01813    | hypothetical protein                               | Accessory |   | 1  | 1  | TM |
| 1057 | 131001_01876    | Ktr system potassium uptake protein B              | Accessory |   | 2  | 2  | TM |
| 1058 | 131001_01893    | hypothetical protein                               | Accessory |   | 3  | 2  | TM |
| 1059 | 131002_00013    | hypothetical protein                               | Accessory |   | 9  | 9  | TM |
| 1060 | 131002_00067    | hypothetical protein                               | Accessory |   | 12 | 12 | TM |
| 1061 | 131002_00072    | hypothetical protein                               | Accessory |   | 3  | 3  | TM |
| 1062 | 131002_00188    | Membrane protein YdfJ                              | Accessory | Y | 11 | 12 | TM |
| 1063 | 131002_00264    | hypothetical protein                               | Accessory | Y | 3  | 3  | TM |
| 1064 | 131002_00293    | hypothetical protein                               | Accessory | Y | 1  | 2  | TM |
| 1065 | 131002_00309    | hypothetical protein                               | Accessory |   | 3  | 3  | TM |
| 1066 | 131002_00393    | hypothetical protein                               | Accessory |   | 3  | 3  | TM |
| 1067 | 131002_00395    | hypothetical protein                               | Accessory |   | 2  | 2  | TM |
| 1068 | 131002_00448    | ESX-1 secretion system protein eccB1               | Accessory |   | 1  | 1  | TM |
| 1069 | 131002_00451    | hypothetical protein                               | Accessory |   | 11 | 8  | TM |

|      |               |                                                             |           |   |    |    |    |
|------|---------------|-------------------------------------------------------------|-----------|---|----|----|----|
| 1070 | 131002_00452  | ESX-1 secretion system protein EccCa1                       | Accessory |   | 2  | 1  | TM |
| 1071 | 131002_00453  | hypothetical protein                                        | Accessory |   | 1  | 1  | TM |
| 1072 | 131002_00493  | Bacterial membrane flanked domain protein                   | Accessory |   | 4  | 3  | TM |
| 1073 | 131002_00720  | hypothetical protein                                        | Accessory |   | 3  | 3  | TM |
| 1074 | 131002_00774  | hypothetical protein                                        | Accessory |   | 1  | 1  | TM |
| 1075 | 131002_00813  | Oligopeptide transport system permease protein OppC         | Accessory |   | 6  | 6  | TM |
| 1076 | 131002_00817  | FtsX-like permease family protein                           | Accessory |   | 10 | 10 | TM |
| 1077 | 131002_00867  | hypothetical protein                                        | Accessory |   | 1  | 1  | TM |
| 1078 | 131002_00935  | hypothetical protein                                        | Accessory |   | 4  | 4  | TM |
| 1079 | 131002_00944  | DoxX                                                        | Accessory |   | 5  | 5  | TM |
| 1080 | 131002_00947  | putative MscS family protein YkuT                           | Accessory |   | 4  | 3  | TM |
| 1081 | 131002_00951  | hypothetical protein                                        | Accessory |   | 1  | 1  | TM |
| 1082 | 131002_00974  | hypothetical protein                                        | Accessory |   | 2  | 2  | TM |
| 1083 | 131002_01098  | hypothetical protein                                        | Accessory |   | 2  | 2  | TM |
| 1084 | 131002_01162  | hypothetical protein                                        | Accessory |   | 1  | 1  | TM |
| 1085 | 131002_01228  | Type IV leader peptidase family protein                     | Accessory |   | 4  | 4  | TM |
| 1086 | 131002_01272  | hypothetical protein                                        | Accessory | Y | 1  | 2  | TM |
| 1087 | 131002_01273  | EamA-like transporter family protein                        | Accessory |   | 8  | 8  | TM |
| 1088 | 131002_01315  | hypothetical protein                                        | Accessory |   | 1  | 1  | TM |
| 1089 | 131002_01384  | hypothetical protein                                        | Accessory |   | 8  | 8  | TM |
| 1090 | 131002_01416  | PTS system mannose-specific EIIBCA component                | Accessory |   | 10 | 9  | TM |
| 1091 | 131002_01528  | cobalamin synthase                                          | Accessory |   | 6  | 8  | TM |
| 1092 | 131002_01542  | Ferric enterobactin transport system permease protein FepG  | Accessory | Y | 3  | 4  | TM |
| 1093 | 131002_01654  | ComEC family competence protein                             | Accessory | Y | 7  | 7  | TM |
| 1094 | 131002_01668  | hypothetical protein                                        | Accessory |   | 4  | 4  | TM |
| 1095 | 131002_01768  | camphor resistance protein CrcB                             | Accessory | Y | 3  | 4  | TM |
| 1096 | 131002_01769  | camphor resistance protein CrcB                             | Accessory |   | 4  | 4  | TM |
| 1097 | 131002_01790  | Cytochrome bd-I ubiquinol oxidase subunit 1                 | Accessory |   | 9  | 9  | TM |
| 1098 | 131002_01792  | ATP-binding/permease protein CydD                           | Accessory |   | 5  | 5  | TM |
| 1099 | 131002_01936  | hypothetical protein                                        | Accessory |   | 8  | 8  | TM |
| 1100 | 131002_01952  | ABC-2 family transporter protein                            | Accessory |   | 6  | 6  | TM |
| 1101 | 131002_02028  | hypothetical protein                                        | Accessory |   | 6  | 6  | TM |
| 1102 | 131002_02070  | Putative undecaprenyl-diphosphatase YbjG                    | Accessory |   | 5  | 4  | TM |
| 1103 | 131002_02159  | hypothetical protein                                        | Accessory |   | 5  | 5  | TM |
| 1104 | 131002_02168  | VanZ like family protein                                    | Accessory |   | 5  | 5  | TM |
| 1105 | 131002_02184  | Tyrosine-specific transport protein                         | Accessory |   | 11 | 11 | TM |
| 1106 | 131002_02212  | Branched-chain amino acid transport protein (AzID)          | Accessory |   | 4  | 4  | TM |
| 1107 | 210931_00245  | hypothetical protein                                        | Accessory |   | 3  | 3  | TM |
| 1108 | 210931_01917  | hypothetical protein                                        | Accessory |   | 1  | 1  | TM |
| 1109 | 210931_01986  | hypothetical protein                                        | Accessory |   | 1  | 1  | TM |
| 1110 | 210931_02088  | pheromone autoinducer 2 transporter                         | Accessory |   | 8  | 8  | TM |
| 1111 | 210931_02094  | hypothetical protein                                        | Accessory |   | 1  | 1  | TM |
| 1112 | 210931_02275  | Glutathione transport system permease protein GsiC          | Accessory |   | 2  | 2  | TM |
| 1113 | 04-3911_00509 | hypothetical protein                                        | Accessory |   | 2  | 1  | TM |
| 1114 | 04-3911_00884 | hypothetical protein                                        | Accessory |   | 3  | 3  | TM |
| 1115 | 04-3911_00923 | Putative multidrug export ATP-binding/permease protein      | Accessory |   | 10 | 11 | TM |
| 1116 | 04-3911_01978 | hypothetical protein                                        | Accessory |   | 2  | 1  | TM |
| 1117 | 04-7514_00073 | hypothetical protein                                        | Accessory |   | 1  | 1  | TM |
| 1118 | 04-7514_00075 | Major Facilitator Superfamily protein                       | Accessory |   | 2  | 2  | TM |
| 1119 | 04-7514_00217 | hypothetical protein                                        | Accessory |   | 4  | 3  | TM |
| 1120 | 04-7514_00332 | OPT oligopeptide transporter protein                        | Accessory |   | 18 | 18 | TM |
| 1121 | 04-7514_00334 | hypothetical protein                                        | Accessory |   | 4  | 4  | TM |
| 1122 | 04-7514_00337 | hypothetical protein                                        | Accessory |   | 2  | 2  | TM |
| 1123 | 04-7514_00633 | hypothetical protein                                        | Accessory |   | 3  | 3  | TM |
| 1124 | 04-7514_00644 | hypothetical protein                                        | Accessory |   | 1  | 1  | TM |
| 1125 | 04-7514_00680 | hypothetical protein                                        | Accessory |   | 2  | 2  | TM |
| 1126 | 04-7514_00775 | hypothetical protein                                        | Accessory |   | 2  | 2  | TM |
| 1127 | 04-7514_00835 | hypothetical protein                                        | Accessory |   | 9  | 8  | TM |
| 1128 | 04-7514_00850 | hypothetical protein                                        | Accessory |   | 1  | 1  | TM |
| 1129 | 04-7514_00855 | Periplasmic pH-dependent serine endoprotease DegQ precursor | Accessory |   | 1  | 1  | TM |
| 1130 | 04-7514_01036 | Glycolate permease GlcA                                     | Accessory |   | 13 | 13 | TM |
| 1131 | 04-7514_01087 | hypothetical protein                                        | Accessory |   | 4  | 3  | TM |
| 1132 | 04-7514_01096 | DoxX                                                        | Accessory |   | 5  | 5  | TM |
| 1133 | 04-7514_01119 | hypothetical protein                                        | Accessory |   | 1  | 1  | TM |
| 1134 | 04-7514_01249 | hypothetical protein                                        | Accessory |   | 2  | 2  | TM |
| 1135 | 04-7514_01395 | ABC-2 family transporter protein                            | Accessory |   | 5  | 4  | TM |
| 1136 | 04-7514_01432 | hypothetical protein                                        | Accessory |   | 1  | 2  | TM |

|      |                      |                                                                                                       |           |   |    |    |    |
|------|----------------------|-------------------------------------------------------------------------------------------------------|-----------|---|----|----|----|
| 1137 | 04-7514_01451        | hypothetical protein                                                                                  | Accessory |   | 2  | 3  | TM |
| 1138 | 04-7514_01470        | hypothetical protein                                                                                  | Accessory |   | 1  | 1  | TM |
| 1139 | 04-7514_01663        | hypothetical protein                                                                                  | Accessory |   | 6  | 5  | TM |
| 1140 | 04-7514_01836        | hypothetical protein                                                                                  | Accessory |   | 4  | 4  | TM |
| 1141 | 04-7514_01931        | hypothetical protein                                                                                  | Accessory |   | 1  | 1  | TM |
| 1142 | 04-7514_01971        | Phosphate transport system permease protein PstC                                                      | Accessory |   | 1  | 1  | TM |
| 1143 | 04-7514_02010        | hypothetical protein                                                                                  | Accessory | Y | 1  | 1  | TM |
| 1144 | 04-7514_02034        | Multidrug resistance protein stp                                                                      | Accessory |   | 14 | 14 | TM |
| 1145 | 04-7514_02038        | hypothetical protein                                                                                  | Accessory |   | 1  | 1  | TM |
| 1146 | 04-7514_02122        | hypothetical protein                                                                                  | Accessory |   | 1  | 1  | TM |
| 1147 | 04-7514_02137        | hypothetical protein                                                                                  | Accessory |   | 1  | 1  | TM |
| 1148 | 04-7514_02203        | hypothetical protein                                                                                  | Accessory |   | 5  | 5  | TM |
| 1149 | 04-7514_02204        | Iron import ATP-binding/permease protein IrtA                                                         | Accessory |   | 6  | 5  | TM |
| 1150 | 04-7514_02238        | Putative undecaprenyl-diphosphatase YbjG                                                              | Accessory |   | 5  | 4  | TM |
| 1151 | 04-7514_02273        | Polyprenol-phosphate-mannose-dependent alpha-(1-2)-phosphatidylinositol mannoside mannosyltransferase | Accessory |   | 2  | 2  | TM |
| 1152 | 04-7514_02319        | hypothetical protein                                                                                  | Accessory |   | 1  | 1  | TM |
| 1153 | 04-7514_02390        | hypothetical protein                                                                                  | Accessory |   | 1  | 1  | TM |
| 1154 | 210932_00804         | putative ABC transporter ATP-binding protein                                                          | Accessory |   | 6  | 6  | TM |
| 1155 | 210932_01993         | Cytochrome c biogenesis protein Ccs1                                                                  | Accessory |   | 4  | 4  | TM |
| 1156 | FRC11_00071          | hypothetical protein                                                                                  | Accessory |   | 3  | 3  | TM |
| 1157 | FRC11_00092          | hypothetical protein                                                                                  | Accessory |   | 1  | 1  | TM |
| 1158 | FRC11_00419          | hypothetical protein                                                                                  | Accessory |   | 2  | 2  | TM |
| 1159 | FRC11_00640          | hypothetical protein                                                                                  | Accessory |   | 3  | 3  | TM |
| 1160 | FRC11_01048          | hypothetical protein                                                                                  | Accessory |   | 3  | 3  | TM |
| 1161 | FRC11_01101          | hypothetical protein                                                                                  | Accessory | Y | 6  | 6  | TM |
| 1162 | FRC11_01273          | hypothetical protein                                                                                  | Accessory | Y | 9  | 10 | TM |
| 1163 | FRC11_01629          | hypothetical protein                                                                                  | Accessory |   | 1  | 1  | TM |
| 1164 | FRC11_01667          | ComEC family competence protein                                                                       | Accessory | Y | 7  | 5  | TM |
| 1165 | FRC11_01681          | hypothetical protein                                                                                  | Accessory |   | 4  | 3  | TM |
| 1166 | FRC11_01760          | hypothetical protein                                                                                  | Accessory |   | 2  | 2  | TM |
| 1167 | FRC11_01782          | camphor resistance protein CrcB                                                                       | Accessory |   | 4  | 4  | TM |
| 1168 | FRC11_01795          | hypothetical protein                                                                                  | Accessory |   | 2  | 2  | TM |
| 1169 | FRC11_02134          | hypothetical protein                                                                                  | Accessory |   | 3  | 3  | TM |
| 1170 | FRC11_02188          | tryptophan permease                                                                                   | Accessory |   | 6  | 6  | TM |
| 1171 | FRC58_00328          | Phage-related minor tail protein                                                                      | Accessory |   | 4  | 4  | TM |
| 1172 | FRC58_00335          | hypothetical protein                                                                                  | Accessory |   | 2  | 2  | TM |
| 1173 | FRC58_01658          | hypothetical protein                                                                                  | Accessory |   | 1  | 1  | TM |
| 1174 | FRC58_01659          | hypothetical protein                                                                                  | Accessory | Y | 3  | 4  | TM |
| 1175 | FRC58_01667          | Phage-related minor tail protein                                                                      | Accessory |   | 6  | 4  | TM |
| 1176 | FRC58_01690          | hypothetical protein                                                                                  | Accessory |   | 2  | 2  | TM |
| 1177 | KZN-2016-48390_00762 | hypothetical protein                                                                                  | Accessory |   | 2  | 1  | TM |
| 1178 | KZN-2016-48390_00764 | CDP-diacylglycerol--inositol 3-phosphatidyltransferase                                                | Accessory |   | 5  | 3  | TM |
| 1179 | KZN-2016-48390_01070 | hypothetical protein                                                                                  | Accessory |   | 2  | 2  | TM |
| 1180 | LSPQ-04227_00013     | putative peptidoglycan biosynthesis protein MviN                                                      | Accessory |   | 1  | 1  | TM |
| 1181 | LSPQ-04227_00044     | Ribose transport system permease protein RbsC                                                         | Accessory | Y | 3  | 4  | TM |
| 1182 | LSPQ-04227_00101     | hypothetical protein                                                                                  | Accessory |   | 3  | 2  | TM |
| 1183 | LSPQ-04227_00108     | Thiol-disulfide oxidoreductase YkuV                                                                   | Accessory |   | 6  | 6  | TM |
| 1184 | LSPQ-04227_00224     | Membrane protein YdfJ                                                                                 | Accessory |   | 2  | 2  | TM |
| 1185 | LSPQ-04227_00259     | Serine-aspartate repeat-containing protein D precursor                                                | Accessory |   | 1  | 1  | TM |
| 1186 | LSPQ-04227_00264     | ABC-2 type transporter                                                                                | Accessory |   | 7  | 7  | TM |
| 1187 | LSPQ-04227_00287     | hypothetical protein                                                                                  | Accessory |   | 2  | 2  | TM |
| 1188 | LSPQ-04227_00288     | hypothetical protein                                                                                  | Accessory |   | 1  | 1  | TM |
| 1189 | LSPQ-04227_00323     | hypothetical protein                                                                                  | Accessory |   | 5  | 5  | TM |
| 1190 | LSPQ-04227_00673     | hypothetical protein                                                                                  | Accessory |   | 1  | 1  | TM |
| 1191 | LSPQ-04227_00691     | hypothetical protein                                                                                  | Accessory |   | 2  | 2  | TM |
| 1192 | LSPQ-04227_00809     | hypothetical protein                                                                                  | Accessory |   | 2  | 2  | TM |
| 1193 | LSPQ-04227_00906     | hypothetical protein                                                                                  | Accessory |   | 1  | 2  | TM |
| 1194 | LSPQ-04227_00951     | Lipid II flippase FtsW                                                                                | Accessory | Y | 3  | 4  | TM |
| 1195 | LSPQ-04227_01233     | hypothetical protein                                                                                  | Accessory |   | 2  | 2  | TM |
| 1196 | LSPQ-04227_01253     | hypothetical protein                                                                                  | Accessory |   | 1  | 1  | TM |
| 1197 | LSPQ-04227_01278     | hypothetical protein                                                                                  | Accessory |   | 1  | 1  | TM |
| 1198 | LSPQ-04227_01527     | Multidrug resistance protein 3                                                                        | Accessory |   | 6  | 6  | TM |
| 1199 | LSPQ-04227_01619     | Arginine transport system permease protein ArtQ                                                       | Accessory |   | 6  | 6  | TM |
| 1200 | LSPQ-04227_01656     | Multidrug resistance protein NorM                                                                     | Accessory | Y | 5  | 6  | TM |
| 1201 | LSPQ-04227_01680     | hypothetical protein                                                                                  | Accessory |   | 2  | 2  | TM |
| 1202 | LSPQ-04227_01826     | hypothetical protein                                                                                  | Accessory |   | 2  | 2  | TM |
| 1203 | LSPQ-04227_01869     | Sec-independent protein translocase protein TatC                                                      | Accessory |   | 1  | 1  | TM |

|      |                  |                                                           |           |   |   |      |             |    |    |         |
|------|------------------|-----------------------------------------------------------|-----------|---|---|------|-------------|----|----|---------|
| 1204 | LSPQ-04227_01877 | Proline-specific permease ProY                            | Accessory |   |   |      |             | 12 | 12 | TM      |
| 1205 | LSPQ-04227_01882 | phage T7 F exclusion suppressor FxsA                      | Accessory | Y |   |      |             | 2  | 3  | TM      |
| 1206 | LSPQ-04227_01961 | Cytochrome bd-II ubiquinol oxidase subunit 1              | Accessory |   |   |      |             | 1  | 1  | TM      |
| 1207 | LSPQ-04227_02001 | Phosphoribosylamine-glycine ligase                        | Accessory |   |   |      |             | 2  | 1  | TM      |
| 1208 | LSPQ-04227_02043 | hypothetical protein                                      | Accessory |   |   |      |             | 2  | 2  | TM      |
| 1209 | LSPQ-04227_02118 | Disulfide bond formation protein DsbB                     | Accessory |   |   |      |             | 5  | 5  | TM      |
| 1210 | LSPQ-04227_02136 | hypothetical protein                                      | Accessory |   |   |      |             | 1  | 1  | TM      |
| 1211 | LSPQ-04227_02163 | hypothetical protein                                      | Accessory |   |   |      |             | 6  | 6  | TM      |
| 1212 | LSPQ-04227_02171 | CAAX amino terminal protease self- immunity               | Accessory |   |   |      |             | 3  | 4  | TM      |
| 1213 | LSPQ-04227_02200 | hypothetical protein                                      | Accessory |   |   |      |             | 2  | 2  | TM      |
| 1214 | LSPQ-04227_02265 | hypothetical protein                                      | Accessory |   |   |      |             | 6  | 7  | TM      |
| 1215 | LSPQ-04227_02276 | Hemin transport system permease protein HmuU              | Accessory |   |   |      |             | 9  | 8  | TM      |
| 1216 | LSPQ-04227_02292 | Transcriptional regulator LytR                            | Accessory |   |   |      |             | 1  | 1  | TM      |
| 1217 | LSPQ-04227_02326 | hypothetical protein                                      | Accessory |   |   |      |             | 2  | 2  | TM      |
| 1218 | LSPQ-04227_02411 | Tetracycline resistance protein, class C                  | Accessory |   |   |      |             | 3  | 3  | TM      |
| 1219 | LSPQ-04227_02415 | Tetracycline resistance protein, class C                  | Accessory | Y |   |      |             | 7  | 7  | TM      |
| 1220 | LSPQ-04228_00144 | hypothetical protein                                      | Accessory |   |   |      |             | 1  | 1  | TM      |
| 1221 | LSPQ-04228_00277 | Manganese transport system membrane protein MntB          | Accessory |   |   |      |             | 4  | 4  | TM      |
| 1222 | LSPQ-04228_00298 | hypothetical protein                                      | Accessory |   |   |      |             | 1  | 1  | TM      |
| 1223 | LSPQ-04228_00378 | hypothetical protein                                      | Accessory |   |   |      |             | 1  | 1  | TM      |
| 1224 | LSPQ-04228_00586 | hypothetical protein                                      | Accessory |   |   |      |             | 3  | 3  | TM      |
| 1225 | LSPQ-04228_00603 | Glycolate permease GlcA                                   | Accessory |   |   |      |             | 5  | 5  | TM      |
| 1226 | LSPQ-04228_00660 | GABA permease                                             | Accessory |   |   |      |             | 4  | 3  | TM      |
| 1227 | LSPQ-04228_00661 | GABA permease                                             | Accessory |   |   |      |             | 2  | 3  | TM      |
| 1228 | LSPQ-04228_00666 | GtrA-like protein                                         | Accessory |   |   |      |             | 1  | 1  | TM      |
| 1229 | LSPQ-04228_00745 | C4-dicarboxylate transporter/malic acid transport protein | Accessory |   |   |      |             | 9  | 9  | TM      |
| 1230 | LSPQ-04228_00930 | hypothetical protein                                      | Accessory |   |   |      |             | 1  | 1  | TM      |
| 1231 | LSPQ-04228_00931 | hypothetical protein                                      | Accessory |   |   |      |             | 1  | 2  | TM      |
| 1232 | LSPQ-04228_01079 | Lipid II flippase FtsW                                    | Accessory | Y |   |      |             | 3  | 4  | TM      |
| 1233 | LSPQ-04228_01080 | Lipid II flippase FtsW                                    | Accessory |   |   |      |             | 6  | 4  | TM      |
| 1234 | LSPQ-04228_01103 | Acyltransferase family protein                            | Accessory |   |   |      |             | 4  | 3  | TM      |
| 1235 | LSPQ-04228_01184 | hypothetical protein                                      | Accessory |   |   |      |             | 2  | 3  | TM      |
| 1236 | LSPQ-04228_01192 | hypothetical protein                                      | Accessory |   |   |      |             | 1  | 1  | TM      |
| 1237 | LSPQ-04228_01349 | hypothetical protein                                      | Accessory |   |   |      |             | 2  | 2  | TM      |
| 1238 | LSPQ-04228_01357 | hypothetical protein                                      | Accessory |   |   |      |             | 2  | 2  | TM      |
| 1239 | LSPQ-04228_01421 | hypothetical protein                                      | Accessory |   |   |      |             | 1  | 1  | TM      |
| 1240 | LSPQ-04228_01492 | Membrane protein YdfJ                                     | Accessory | Y |   |      |             | 5  | 6  | TM      |
| 1241 | LSPQ-04228_01786 | SPFH domain / Band 7 family protein                       | Accessory |   |   |      |             | 2  | 2  | TM      |
| 1242 | LSPQ-04228_01790 | hypothetical protein                                      | Accessory |   |   |      |             | 2  | 2  | TM      |
| 1243 | LSPQ-04228_01947 | hypothetical protein                                      | Accessory |   |   |      |             | 6  | 7  | TM      |
| 1244 | LSPQ-04228_01965 | MMPL family protein                                       | Accessory |   |   |      |             | 1  | 1  | TM      |
| 1245 | LSPQ-04228_02067 | hypothetical protein                                      | Accessory |   |   |      |             | 9  | 8  | TM      |
| 1246 | NCTC12077_00168  | hypothetical protein                                      | Accessory | Y |   |      |             | 4  | 5  | TM      |
| 1247 | NCTC12077_00262  | hypothetical protein                                      | Accessory |   |   |      |             | 3  | 3  | TM      |
| 1248 | NCTC12077_00490  | Putative cryptic C4-dicarboxylate transporter DcuD        | Accessory | Y |   |      |             | 7  | 8  | TM      |
| 1249 | NCTC12077_00659  | hypothetical protein                                      | Accessory |   |   |      |             | 1  | 1  | TM      |
| 1250 | NCTC12077_00664  | hypothetical protein                                      | Accessory |   |   |      |             | 1  | 1  | TM      |
| 1251 | NCTC12077_01221  | hypothetical protein                                      | Accessory |   |   |      |             | 1  | 1  | TM      |
| 1252 | NCTC12077_01924  | Glycine betaine transporter OpuD                          | Accessory |   |   |      |             | 12 | 12 | TM      |
| 1253 | NCTC12077_01928  | Nickel transport system permease protein NikB             | Accessory |   |   |      |             | 3  | 3  | TM      |
| 1254 | NCTC12077_02481  | Alpha-(1->3)-arabinofuranosyltransferase                  | Accessory |   |   |      |             | 12 | 10 | TM      |
| 1255 | NCTC12077_02491  | hypothetical protein                                      | Accessory |   |   |      |             | 2  | 2  | TM      |
| 1256 | LSPQ-04227_02242 | hypothetical protein                                      | Accessory |   |   |      |             | 1  | 1  | TM      |
| 1257 | BRAD22_01900     | Peptidoglycan-N-acetylglucosamine deacetylase             | Accessory | Y |   | SplI | Lipoprotein | 1  | 1  | TM-Lipo |
| 1258 | 809_00221        | Chromosome partition protein Smc                          | Accessory | Y | Y |      |             | 1  | 2  | TM-Sec  |
| 1259 | 809_00252        | Na(+)/H(+) antiporter subunit A                           | Accessory | Y | Y |      |             | 23 | 23 | TM-Sec  |
| 1260 | 809_00385        | hypothetical protein                                      | Accessory | Y | Y |      |             | 1  | 1  | TM-Sec  |
| 1261 | 809_00467        | Thermostable alkaline protease precursor                  | Accessory | Y | Y |      |             | 1  | 2  | TM-Sec  |
| 1262 | 809_00524        | Htaa                                                      | Accessory | Y | Y |      |             | 1  | 1  | TM-Sec  |
| 1263 | 809_00532        | putative peptidase precursor                              | Accessory | Y | Y |      |             | 1  | 1  | TM-Sec  |
| 1264 | 809_00979        | hypothetical protein                                      | Accessory | Y | Y |      |             | 1  | 1  | TM-Sec  |
| 1265 | 809_01093        | hypothetical protein                                      | Accessory | Y | Y |      |             | 2  | 3  | TM-Sec  |
| 1266 | 809_01321        | hypothetical protein                                      | Accessory | Y | Y |      |             | 1  | 1  | TM-Sec  |
| 1267 | 809_01921        | hypothetical protein                                      | Accessory | Y | Y |      |             | 1  | 2  | TM-Sec  |
| 1268 | 809_01933        | Chromosome partition protein Smc                          | Accessory | Y | Y |      |             | 1  | 2  | TM-Sec  |
| 1269 | 809_02041        | Chromosome partition protein Smc                          | Accessory | Y | Y |      |             | 1  | 1  | TM-Sec  |
| 1270 | 809_02042        | chromosome segregation protein                            | Accessory | Y | Y |      |             | 1  | 1  | TM-Sec  |

|      |                  |                                                        |           |   |   |    |    |          |        |
|------|------------------|--------------------------------------------------------|-----------|---|---|----|----|----------|--------|
| 1271 | 809_02048        | putative peptidase precursor                           | Accessory | Y | Y | 1  | 1  |          | TM-Sec |
| 1272 | 809_02108        | Alpha-(1->3)-arabinofuranosyltransferase               | Accessory | Y | Y | 12 | 9  |          | TM-Sec |
| 1273 | 809_02155        | hypothetical protein                                   | Accessory | Y | Y | 1  | 1  |          | TM-Sec |
| 1274 | 809_02198        | hypothetical protein                                   | Accessory | Y | Y | 1  | 1  |          | TM-Sec |
| 1275 | 809_02215        | Htaa                                                   | Accessory | Y | Y | 1  | 1  |          | TM-Sec |
| 1276 | 809_02219        | VanZ like family protein                               | Accessory | Y | Y | 4  | 5  |          | TM-Sec |
| 1277 | BRAD22_00221     | Chromosome partition protein Smc                       | Accessory | Y | Y | 1  | 1  |          | TM-Sec |
| 1278 | BRAD22_00533     | Htaa                                                   | Accessory | Y | Y | 1  | 1  |          | TM-Sec |
| 1279 | BRAD22_01329     | hypothetical protein                                   | Accessory | Y | Y | 1  | 2  |          | TM-Sec |
| 1280 | BRAD22_02197     | Chromosome partition protein Smc                       | Accessory | Y | Y | 1  | 1  |          | TM-Sec |
| 1281 | BRAD22_02198     | chromosome segregation protein                         | Accessory | Y | Y | 1  | 1  |          | TM-Sec |
| 1282 | BRAD22_02307     | hypothetical protein                                   | Accessory | Y | Y | 1  | 1  |          | TM-Sec |
| 1283 | 0102_00291       | Na(+)/H(+) antiporter subunit A                        | Accessory | Y | Y | 23 | 23 |          | TM-Sec |
| 1284 | 0102_00628       | Htaa                                                   | Accessory | Y | Y | 1  | 1  |          | TM-Sec |
| 1285 | 0102_01423       | hypothetical protein                                   | Accessory | Y | Y | 1  | 1  |          | TM-Sec |
| 1286 | 0102_02144       | chromosome segregation protein                         | Accessory | Y | Y | 1  | 1  |          | TM-Sec |
| 1287 | 0102_02253       | hypothetical protein                                   | Accessory | Y | Y | 1  | 1  |          | TM-Sec |
| 1288 | 0102_02302       | hypothetical protein                                   | Accessory | Y | Y | 1  | 1  |          | TM-Sec |
| 1289 | 2590_00933       | Htaa                                                   | Accessory | Y | Y | 1  | 1  |          | TM-Sec |
| 1290 | 2590_01061       | hypothetical protein                                   | Accessory | Y | Y | 6  | 8  |          | TM-Sec |
| 1291 | 2590_01736       | Htaa                                                   | Accessory | Y | Y | 1  | 1  |          | TM-Sec |
| 1292 | 2590_01753       | hypothetical protein                                   | Accessory | Y | Y | 1  | 1  |          | TM-Sec |
| 1293 | 4940_00210       | hypothetical protein                                   | Accessory | Y | Y | 1  | 2  |          | TM-Sec |
| 1294 | 4940_00482       | hypothetical protein                                   | Accessory | Y | Y | 1  | 1  |          | TM-Sec |
| 1295 | 131001_00366     | hypothetical protein                                   | Accessory | Y | Y | 1  | 2  |          | TM-Sec |
| 1296 | 131001_01814     | hypothetical protein                                   | Accessory | Y | Y | 1  | 1  |          | TM-Sec |
| 1297 | 131001_02030     | chromosome segregation protein                         | Accessory | Y | Y | 1  | 1  |          | TM-Sec |
| 1298 | 131001_02201     | Htaa                                                   | Accessory | Y | Y | 1  | 1  |          | TM-Sec |
| 1299 | 131002_00370     | hypothetical protein                                   | Accessory | Y | Y | 1  | 1  |          | TM-Sec |
| 1300 | 131002_00450     | Thermostable alkaline protease precursor               | Accessory | Y | Y | 1  | 2  |          | TM-Sec |
| 1301 | 131002_00516     | putative peptidase precursor                           | Accessory | Y | Y | 1  | 1  |          | TM-Sec |
| 1302 | 131002_01249     | hypothetical protein                                   | Accessory | Y | Y | 1  | 2  |          | TM-Sec |
| 1303 | 131002_01760     | hypothetical protein                                   | Accessory | Y | Y | 1  | 2  |          | TM-Sec |
| 1304 | 131002_01856     | hypothetical protein                                   | Accessory | Y | Y | 1  | 2  |          | TM-Sec |
| 1305 | 131002_01976     | chromosome segregation protein                         | Accessory | Y | Y | 1  | 1  |          | TM-Sec |
| 1306 | 131002_02090     | hypothetical protein                                   | Accessory | Y | Y | 1  | 1  |          | TM-Sec |
| 1307 | 131002_02136     | hypothetical protein                                   | Accessory | Y | Y | 1  | 1  |          | TM-Sec |
| 1308 | 210931_00522     | Htaa                                                   | Accessory | Y | Y | 1  | 1  |          | TM-Sec |
| 1309 | 210931_01269     | hypothetical protein                                   | Accessory | Y | Y | 1  | 1  |          | TM-Sec |
| 1310 | 04-7514_00516    | Thermostable alkaline protease precursor               | Accessory | Y | Y | 1  | 2  |          | TM-Sec |
| 1311 | 04-7514_02025    | hypothetical protein                                   | Accessory | Y | Y | 1  | 2  |          | TM-Sec |
| 1312 | 04-7514_02039    | Chromosome partition protein Smc                       | Accessory | Y | Y | 1  | 2  |          | TM-Sec |
| 1313 | 04-7514_02259    | hypothetical protein                                   | Accessory | Y | Y | 1  | 1  |          | TM-Sec |
| 1314 | FRC11_00212      | Chromosome partition protein Smc                       | Accessory | Y | Y | 1  | 1  |          | TM-Sec |
| 1315 | FRC11_01774      | hypothetical protein                                   | Accessory | Y | Y | 1  | 2  |          | TM-Sec |
| 1316 | FRC11_02142      | hypothetical protein                                   | Accessory | Y | Y | 1  | 1  |          | TM-Sec |
| 1317 | LSPQ-04227_02166 | chromosome segregation protein                         | Accessory | Y | Y | 1  | 1  |          | TM-Sec |
| 1318 | LSPQ-04227_02239 | Alpha-(1->3)-arabinofuranosyltransferase               | Accessory | Y | Y | 8  | 8  |          | TM-Sec |
| 1319 | LSPQ-04228_01424 | Na(+)/H(+) antiporter subunit A                        | Accessory | Y | Y | 10 | 10 |          | TM-Sec |
| 1320 | 809_01832        | hypothetical protein                                   | Accessory | Y | Y | 1  | 1  |          | TM-Sec |
| 1321 | 809_01833        | hypothetical protein                                   | Accessory | Y | Y | 1  | 2  |          | TM-Sec |
| 1322 | 809_02034        | hypothetical protein                                   | Accessory |   | Y | 1  | 2  | sortaseA | LPXTG  |
| 1323 | BRAD22_00230     | Serine-aspartate repeat-containing protein D precursor | Accessory | Y |   | 1  | 1  | sortaseD | LPXTG  |
| 1324 | 809_00230        | Serine-aspartate repeat-containing protein D precursor | Accessory | Y |   | 1  | 1  | sortaseD | LPXTG  |
| 1325 | 809_01831        | hypothetical protein                                   | Accessory | Y |   | 2  | 2  | sortaseD | LPXTG  |
| 1326 | 809_01906        | hypothetical protein                                   | Accessory | Y |   | 2  | 2  | sortaseD | LPXTG  |
| 1327 | 809_02033        | hypothetical protein                                   | Accessory | Y |   | 2  | 2  | sortaseA | LPXTG  |
| 1328 | BRAD22_02192     | Fimbrial subunit type 1 precursor                      | Accessory | Y |   | 1  | 1  | sortaseA | LPXTG  |
| 1329 | 0102_02134       | hypothetical protein                                   | Accessory | Y |   | 2  | 2  | sortaseA | LPXTG  |
| 1330 | 2590_02191       | Serine-aspartate repeat-containing protein D precursor | Accessory | Y |   | 1  | 1  | sortaseD | LPXTG  |
| 1331 | BRAD-2649_00472  | hypothetical protein                                   | Accessory | Y |   | 2  | 2  | sortaseD | LPXTG  |
| 1332 | BRAD-2649_00995  | hypothetical protein                                   | Accessory |   | Y | 1  | 2  | sortaseA | LPXTG  |
| 1333 | 210931_01993     | T surface-antigen of pili                              | Accessory |   | Y | 1  | 2  | sortaseD | LPXTG  |
| 1334 | 809_00022        | hypothetical protein                                   | Accessory | Y | Y | 1  | 2  | sortaseD | LPXTG  |
| 1335 | 809_00229        | hypothetical protein                                   | Accessory | Y | Y | 1  | 1  | sortaseD | LPXTG  |
| 1336 | 809_00236        | T surface-antigen of pili                              | Accessory | Y | Y | 1  | 2  | sortaseD | LPXTG  |
| 1337 | 809_00380        | hypothetical protein                                   | Accessory | Y | Y | 1  | 2  | sortaseA | LPXTG  |

|      |                 |                                                        |           |   |   |   |   |          |       |
|------|-----------------|--------------------------------------------------------|-----------|---|---|---|---|----------|-------|
| 1338 | 809_00390       | hypothetical protein                                   | Accessory | Y | Y | 2 | 2 | sortaseD | LPXTG |
| 1339 | 809_01193       | hypothetical protein                                   | Accessory | Y | Y | 1 | 2 | sortaseD | LPXTG |
| 1340 | 809_01973       | T surface-antigen of pili                              | Accessory | Y | Y | 1 | 2 | sortaseD | LPXTG |
| 1341 | 809_02024       | Serine-aspartate repeat-containing protein D precursor | Accessory | Y | Y | 1 | 1 | sortaseD | LPXTG |
| 1342 | 809_02036       | Fimbrial subunit type 1 precursor                      | Accessory | Y | Y | 1 | 1 | sortaseA | LPXTG |
| 1343 | 809_02225       | hypothetical protein                                   | Accessory | Y | Y | 1 | 2 | sortaseD | LPXTG |
| 1344 | 809_02230       | hypothetical protein                                   | Accessory | Y | Y | 1 | 2 | sortaseD | LPXTG |
| 1345 | BRAD22_01201    | hypothetical protein                                   | Accessory | Y | Y | 1 | 2 | sortaseD | LPXTG |
| 1346 | BRAD22_02007    | hypothetical protein                                   | Accessory | Y | Y | 1 | 3 | sortaseD | LPXTG |
| 1347 | BRAD22_02131    | T surface-antigen of pili                              | Accessory | Y | Y | 1 | 1 | sortaseD | LPXTG |
| 1348 | BRAD22_02287    | hypothetical protein                                   | Accessory | Y | Y | 1 | 2 | sortaseD | LPXTG |
| 1349 | BRAD22_02383    | hypothetical protein                                   | Accessory | Y | Y | 1 | 2 | sortaseD | LPXTG |
| 1350 | 0102_01296      | hypothetical protein                                   | Accessory | Y | Y | 1 | 2 | sortaseD | LPXTG |
| 1351 | 0102_02124      | Serine-aspartate repeat-containing protein D precursor | Accessory | Y | Y | 1 | 1 | sortaseD | LPXTG |
| 1352 | 0102_02137      | Fimbrial subunit type 1 precursor                      | Accessory | Y | Y | 1 | 2 | sortaseA | LPXTG |
| 1353 | 2590_02003      | Fimbrial subunit type 1 precursor                      | Accessory | Y | Y | 1 | 1 | sortaseA | LPXTG |
| 1354 | 2590_02054      | hypothetical protein                                   | Accessory | Y | Y | 1 | 2 | sortaseD | LPXTG |
| 1355 | 2590_02190      | hypothetical protein                                   | Accessory | Y | Y | 1 | 1 | sortaseD | LPXTG |
| 1356 | 2590_02197      | T surface-antigen of pili                              | Accessory | Y | Y | 1 | 2 | sortaseD | LPXTG |
| 1357 | BRAD-2649_00712 | hypothetical protein                                   | Accessory | Y | Y | 2 | 2 | sortaseD | LPXTG |
| 1358 | BRAD-2649_01051 | T surface-antigen of pili                              | Accessory | Y | Y | 1 | 2 | sortaseD | LPXTG |
| 1359 | BRAD-2649_01069 | hypothetical protein                                   | Accessory | Y | Y | 1 | 1 | sortaseD | LPXTG |
| 1360 | BRAD-2649_01281 | hypothetical protein                                   | Accessory | Y | Y | 1 | 2 | sortaseD | LPXTG |
| 1361 | BRAD-2649_01355 | hypothetical protein                                   | Accessory | Y | Y | 1 | 2 | sortaseD | LPXTG |
| 1362 | 4940_00509      | hypothetical protein                                   | Accessory | Y | Y | 1 | 2 | sortaseD | LPXTG |
| 1363 | 131001_00364    | hypothetical protein                                   | Accessory | Y | Y | 1 | 2 | sortaseA | LPXTG |
| 1364 | 131002_00219    | hypothetical protein                                   | Accessory | Y | Y | 1 | 1 | sortaseD | LPXTG |
| 1365 | 131002_01170    | hypothetical protein                                   | Accessory | Y | Y | 1 | 2 | sortaseD | LPXTG |
| 1366 | 131002_01957    | Serine-aspartate repeat-containing protein D precursor | Accessory | Y | Y | 1 | 1 | sortaseD | LPXTG |
| 1367 | 131002_02164    | hypothetical protein                                   | Accessory | Y | Y | 1 | 2 | sortaseD | LPXTG |

Abbreviations:

|             |                                                          |
|-------------|----------------------------------------------------------|
| Amb         | Ambiguous                                                |
| Sec-Spl     | Secreted protein with Spl signal peptide                 |
| Sec-Lipo    | Lipoprotein                                              |
| TM          | Protein with transmembrane domains                       |
| TM-Sec      | Transmembrane proteins with Spl signal peptide           |
| TM-Sec-Lipo | Transmembrane proteins with Spl signal peptide (Lipobox) |
| LPXTG       | Cell wall-anchored proteins                              |
