# Supplementary material for: Genomic analyses reveal two distinct lineages of Corynebacterium ulcerans strains
Source: PubMed Central journal article supplement (PMC6038270; doi:10.1016/j.nmni.2018.05.005), 2018-05-25
Supplement: mmc3.pdf [file mmc3.pdf]

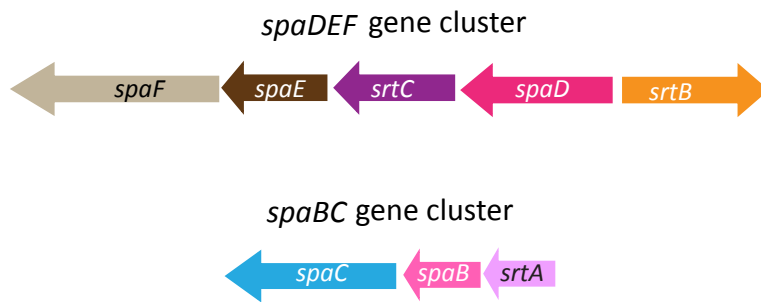

**Supplementary Figure 1.** A general organisation of pilus gene clusters in *C. ulcerans* strains. The direction of the arrow indicates the orientation of the coding sequence. The schematic is not to scale.
